# Supplementary material for: Effect of Cannabis sativa L. extracts, phytocannabinoids and their acetylated derivates on the SHSY-5Y neuroblastoma cells’ viability and caspases 3/7 activation
Source: Springer Nature journal article supplement (doi:10.1186/s40659-024-00506-0), 2024-05-27

**A****Acetate Extract**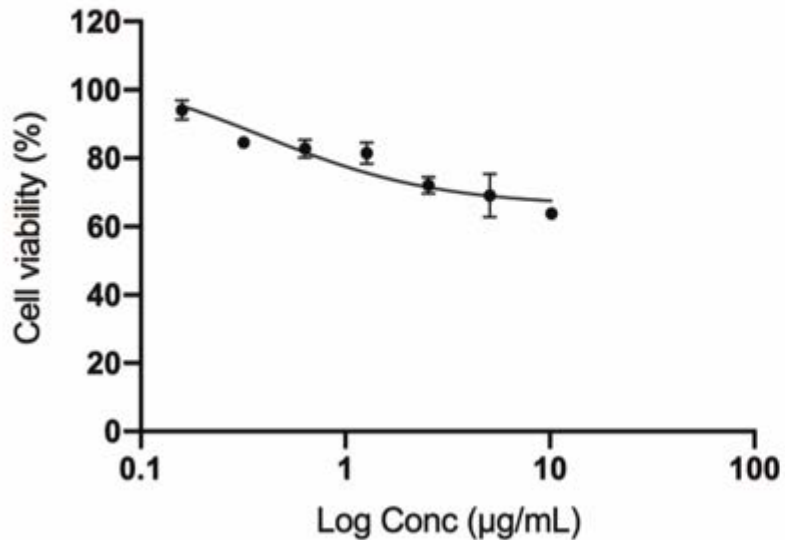**B****Hexane Extract**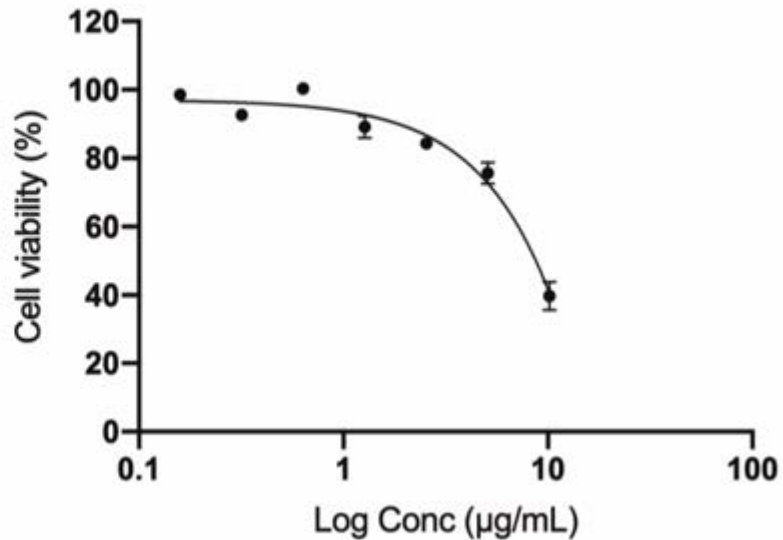

MCO 16  
CDC13

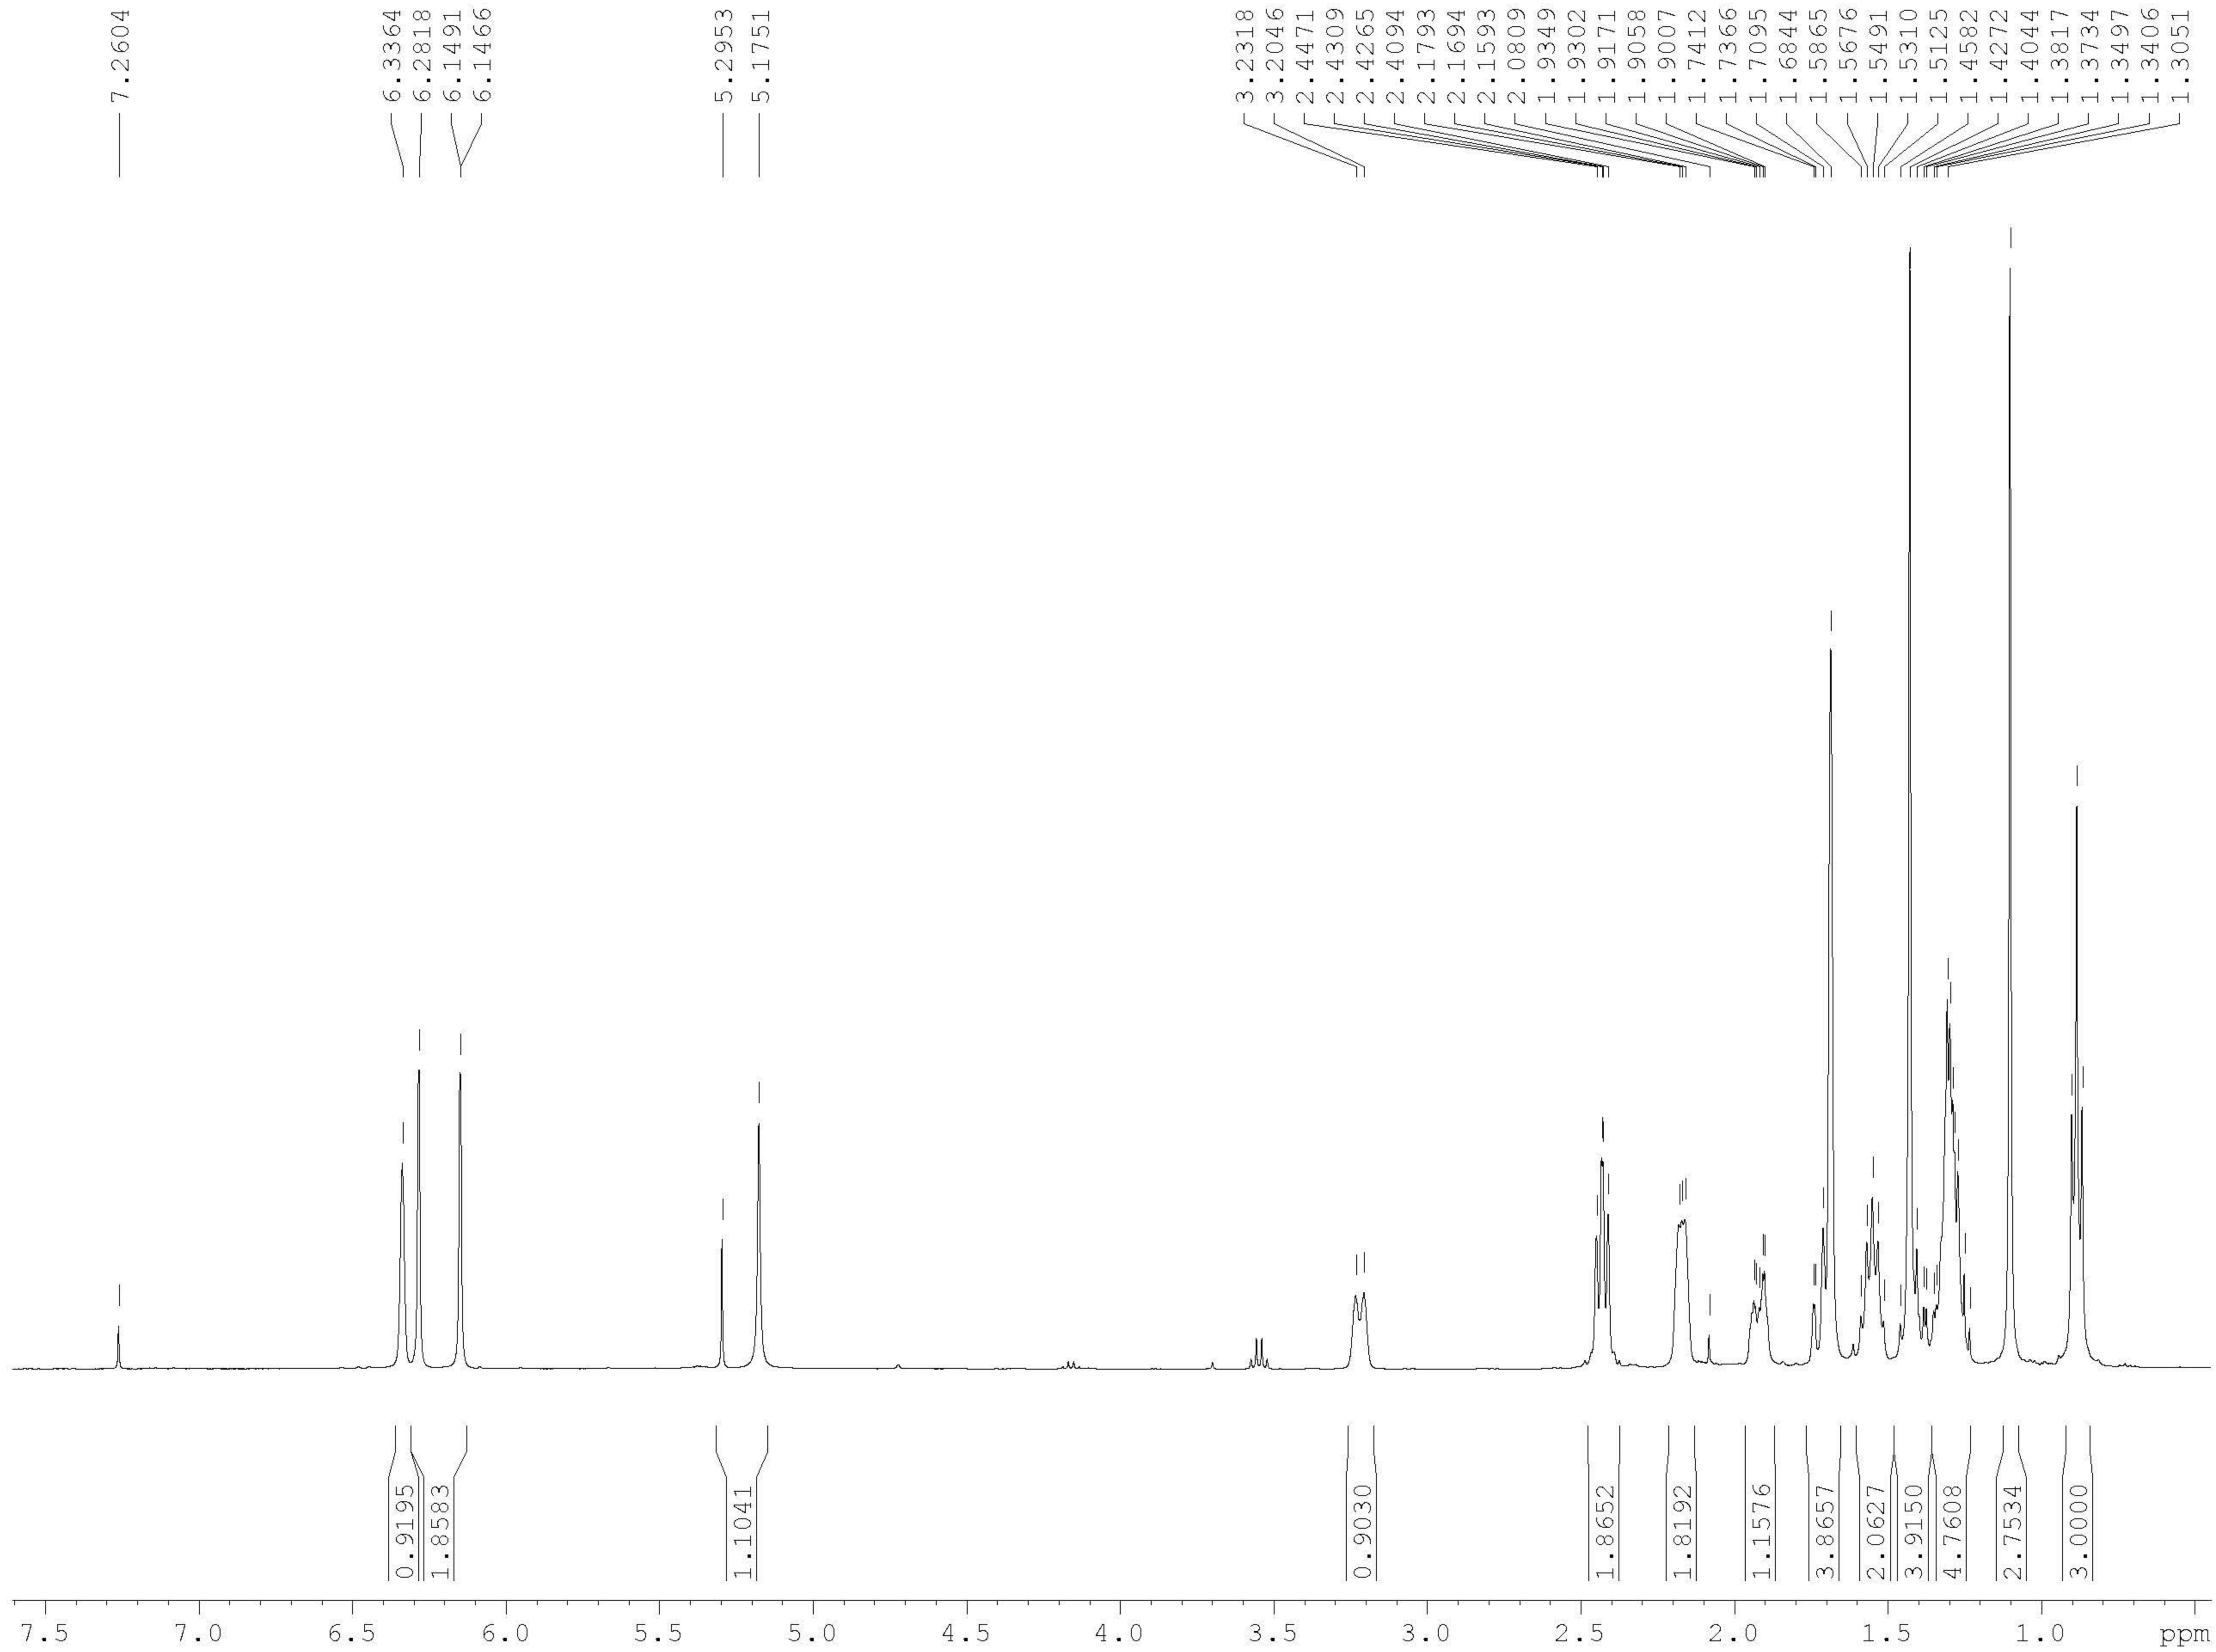

Current Data Parameters  
NAME Mauricio Cuellar  
EXPNO 28  
PROCNO 1

F2 - Acquisition Parameters  
Date\_ 20210826  
Time 14.32 h  
INSTRUM Avance  
PROBHD Z8202\_0253 (BB  
PULPROG zg30  
TD 32768  
SOLVENT CDC13  
NS 8  
DS 2  
SWH 4854.369 Hz  
FIDRES 0.296287 Hz  
AQ 3.3751040 sec  
RG 30.7447  
DW 103.000 usec  
DE 11.68 usec  
TE 0 K  
D1 1.00000000 sec  
TD0 1  
SFO1 400.1442408 MHz  
NUC1 1H  
P0 2.33 usec  
P1 7.00 usec  
PLW1 15.52000046 W

F2 - Processing parameters  
SI 65536  
SF 400.1420097 MHz  
WDW EM  
SSB 0  
LB 0.30 Hz  
GB 0  
PC 1.00

MCO 16  
CDC13

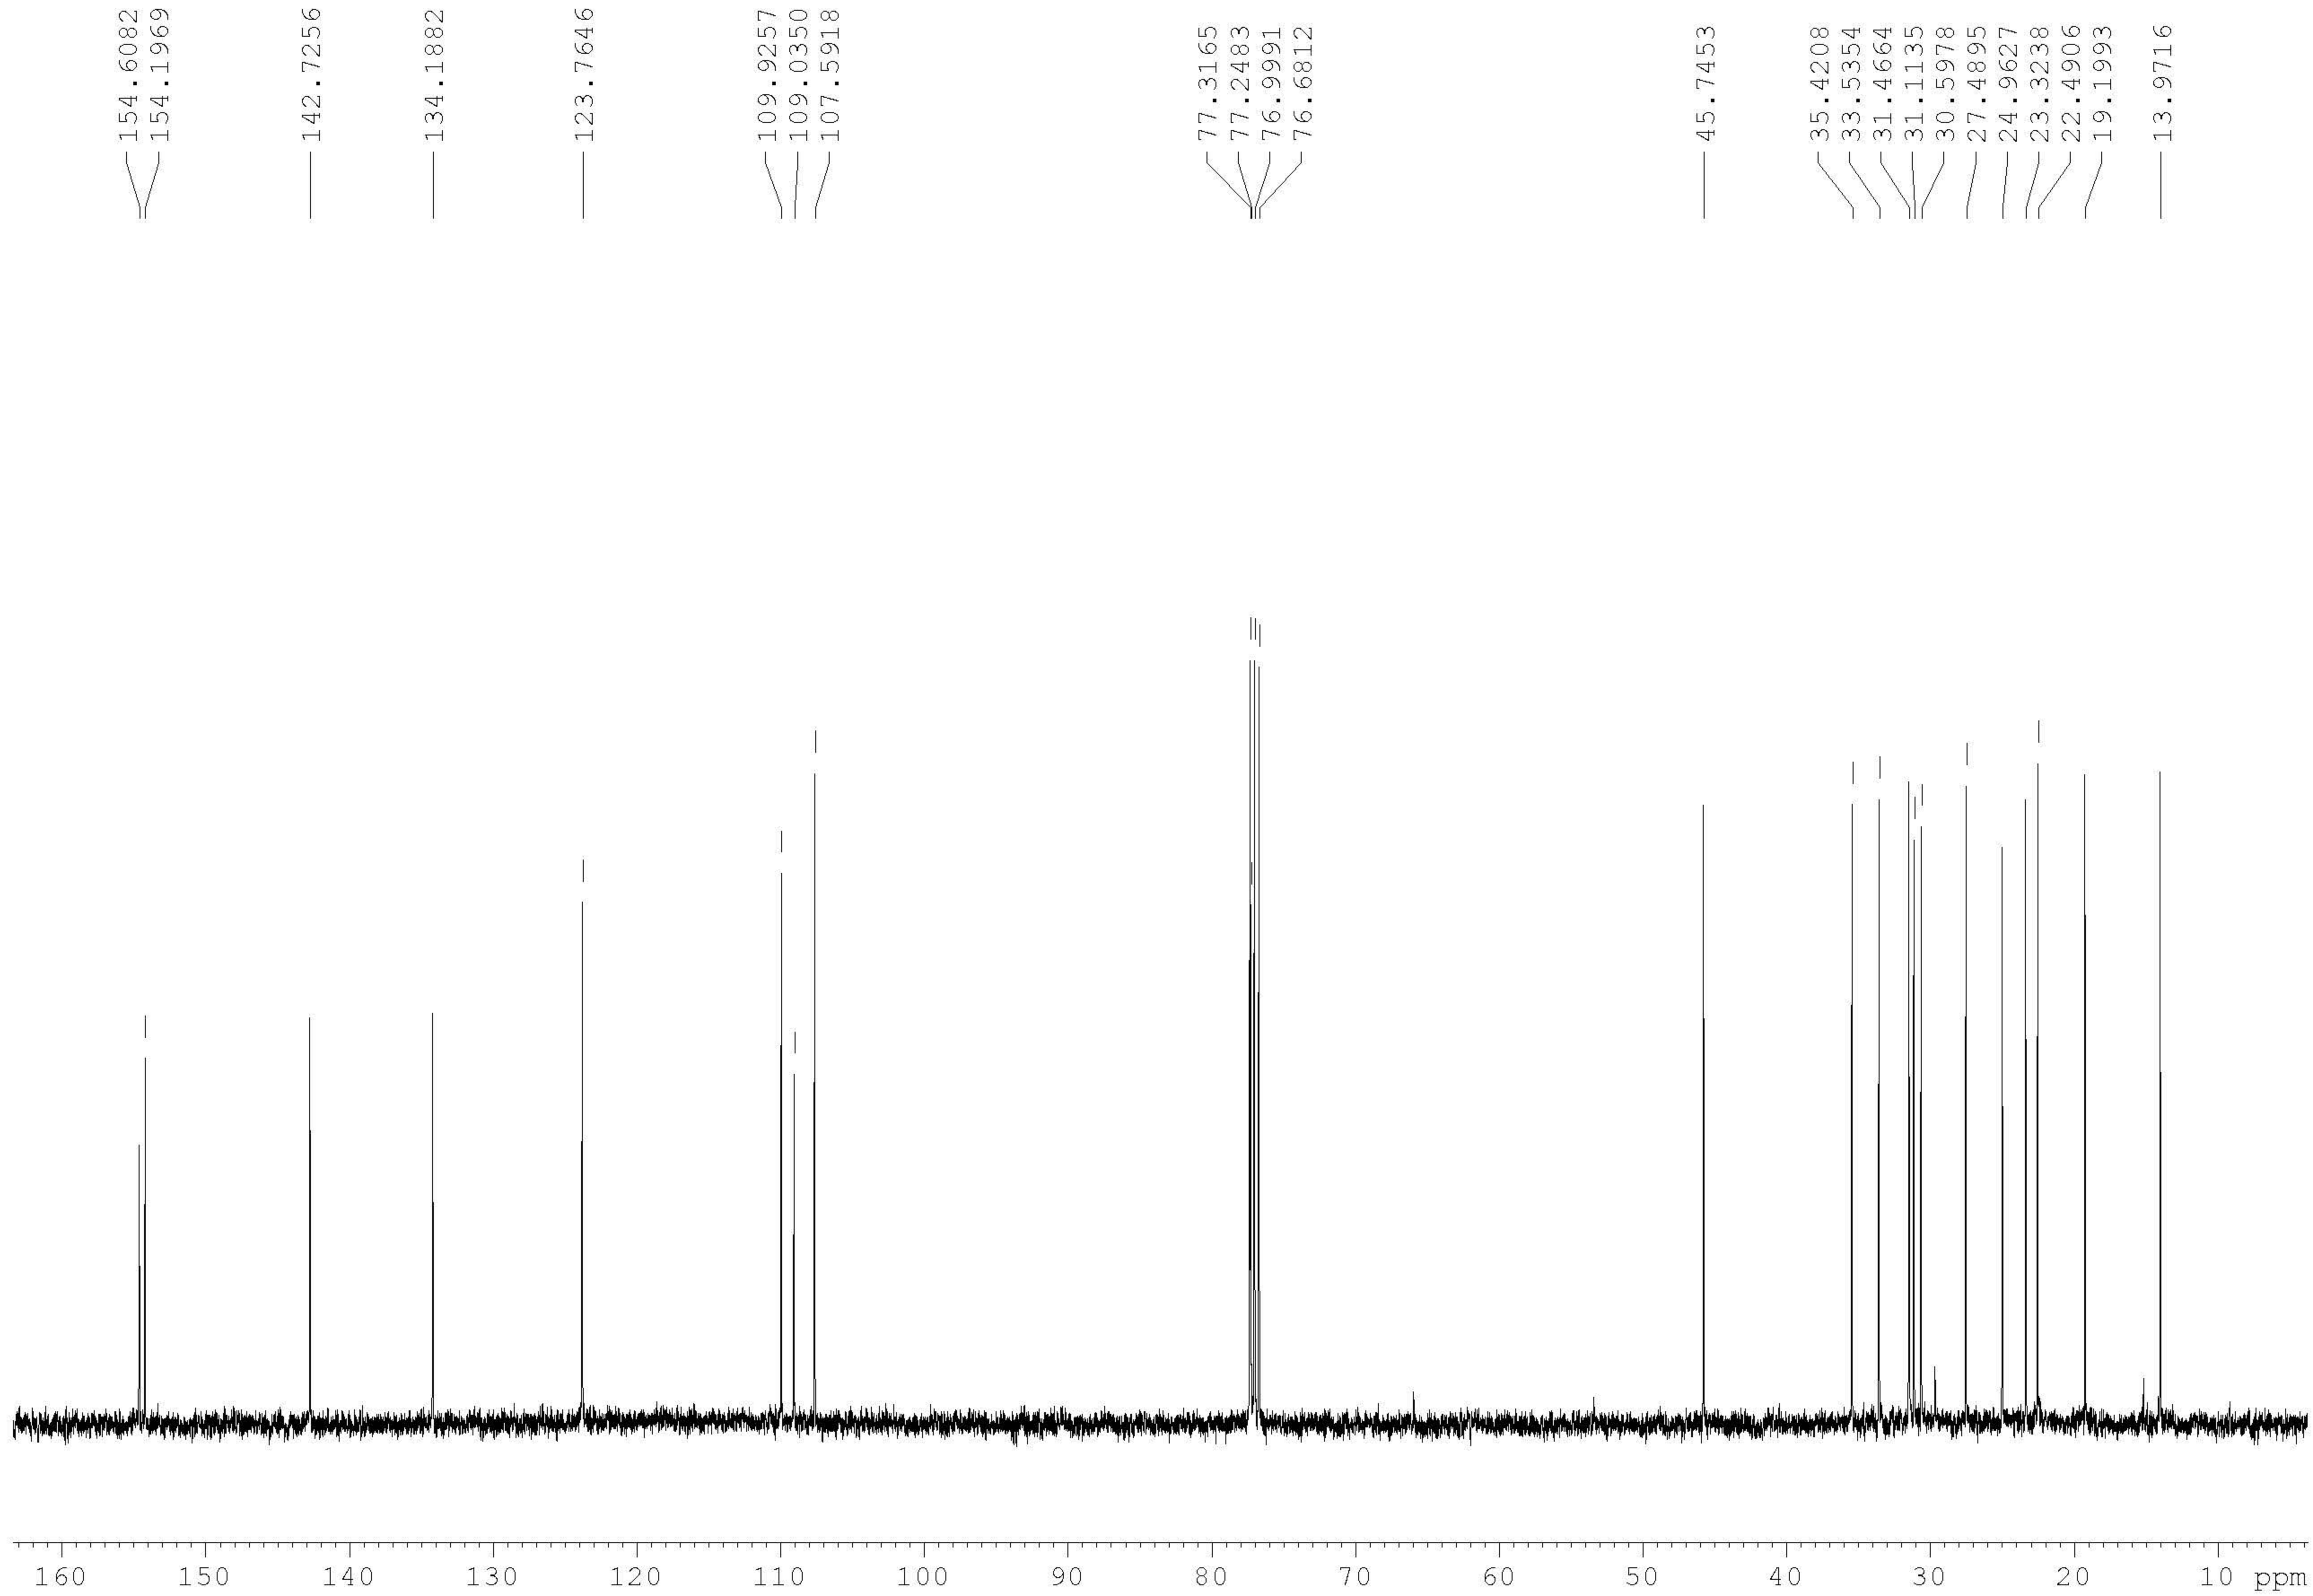

Current Data Parameters  
NAME Mauricio Cuellar  
EXPNO 29  
PROCNO 1

F2 - Acquisition Parameters  
Date\_ 20210826  
Time 14.43 h  
INSTRUM Avance  
PROBHD Z8202\_0253 (BB)  
PULPROG zgpg30  
TD 65536  
SOLVENT CDC13  
NS 256  
DS 4  
SWH 23809.523 Hz  
FIDRES 0.726609 Hz  
AQ 1.3762560 sec  
RG 3.25  
DW 21.000 usec  
DE 6.50 usec  
TE 0 K  
D1 1.00000000 sec  
D11 0.03000000 sec  
TD0 1  
SFO1 100.6258475 MHz  
NUC1 13C  
P0 5.00 usec  
P1 15.00 usec  
PLW1 100.09999847 W  
SFO2 400.1436006 MHz  
NUC2 1H  
CPDPRG[2] waltz65  
PCPD2 90.00 usec  
PLW2 15.52000046 W  
PLW12 0.09388900 W  
PLW13 0.04722500 W

F2 - Processing parameters  
SI 32768  
SF 100.6157948 MHz  
WDW EM  
SSB 0  
LB 1.00 Hz  
GB 0  
PC 1.40

THCA  
CDC13

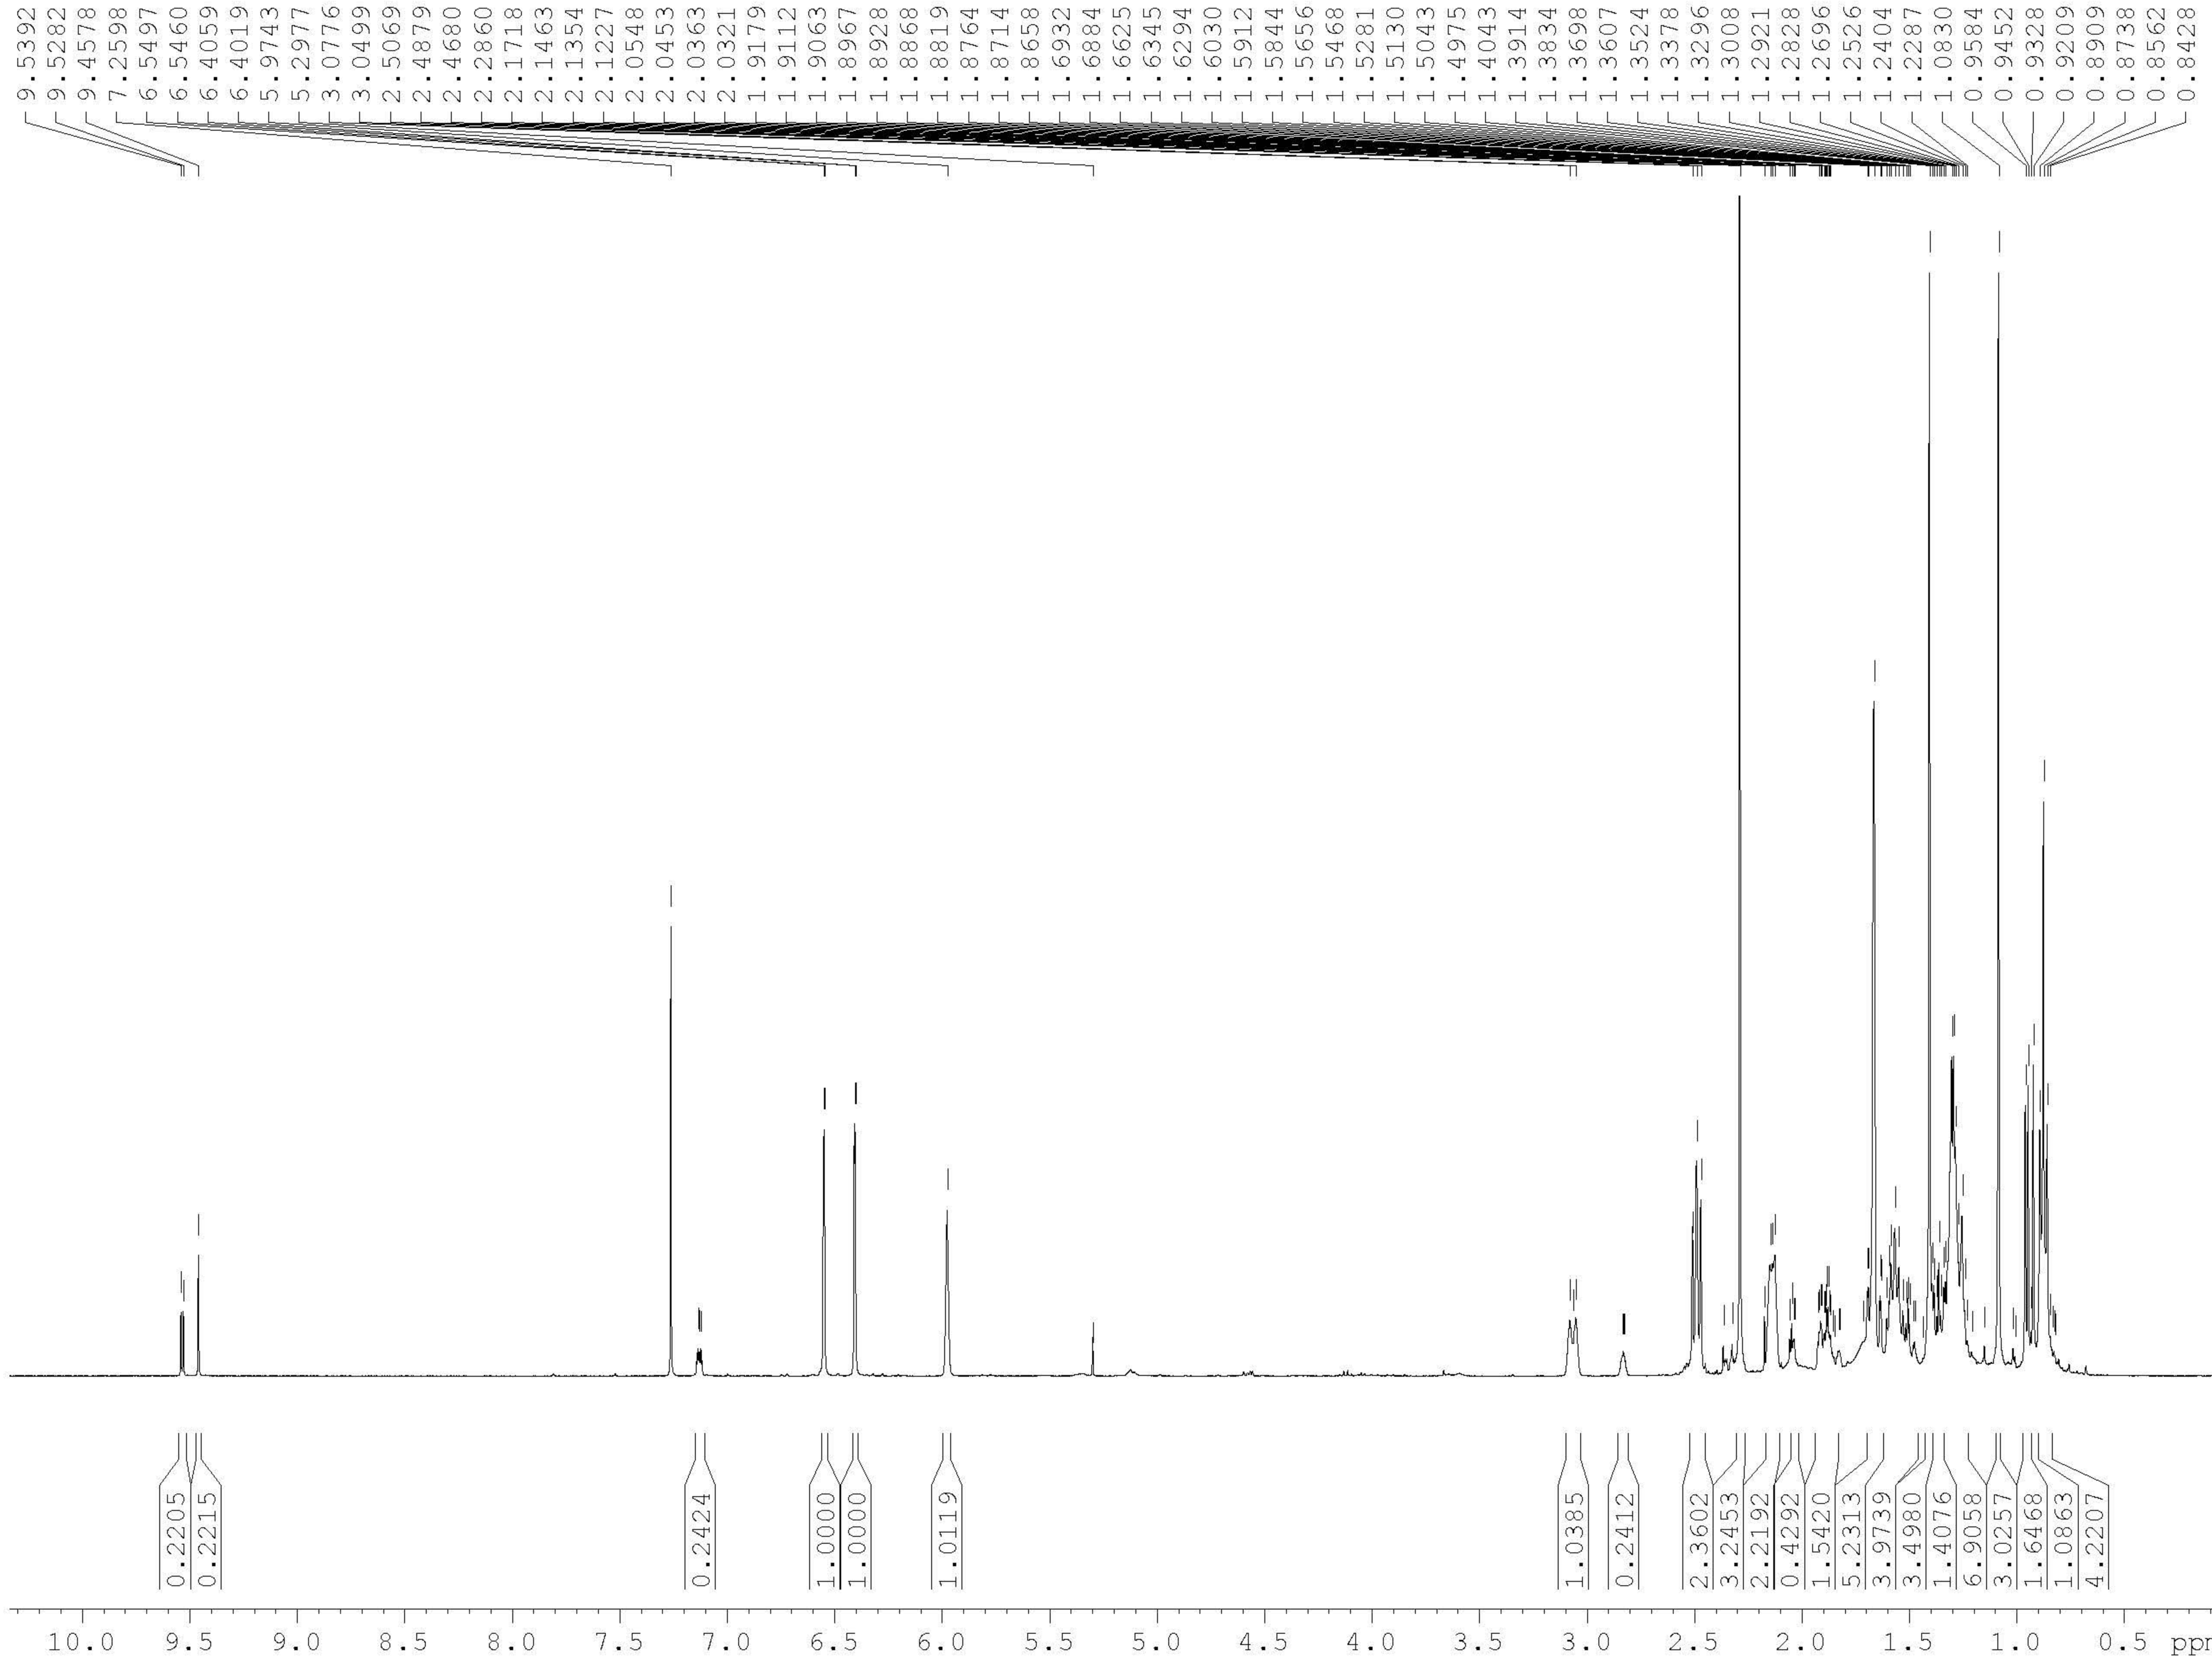

Current Data Parameters  
NAME Mauricio Cuellar  
EXPNO 446  
PROCNO 1

F2 - Acquisition Parameters  
Date\_ 20220819  
Time 8.33 h  
INSTRUM Avance  
PROBHD Z8202\_0253 (BB  
PULPROG zg30  
TD 32768  
SOLVENT CDC13  
NS 8  
DS 2  
SWH 4854.369 Hz  
FIDRES 0.296287 Hz  
AQ 3.3751040 sec  
RG 101  
DW 103.000 usec  
DE 11.68 usec  
TE 0 K  
D1 1.00000000 sec  
TDO 1  
SFO1 400.1442408 MHz  
NUC1 1H  
P0 2.33 usec  
P1 7.00 usec  
PLW1 15.52000046 W

F2 - Processing parameters  
SI 65536  
SF 400.1420100 MHz  
WDW EM  
SSB 0  
LB 0.30 Hz  
GB 0  
PC 1.00

T-2  
CDC13

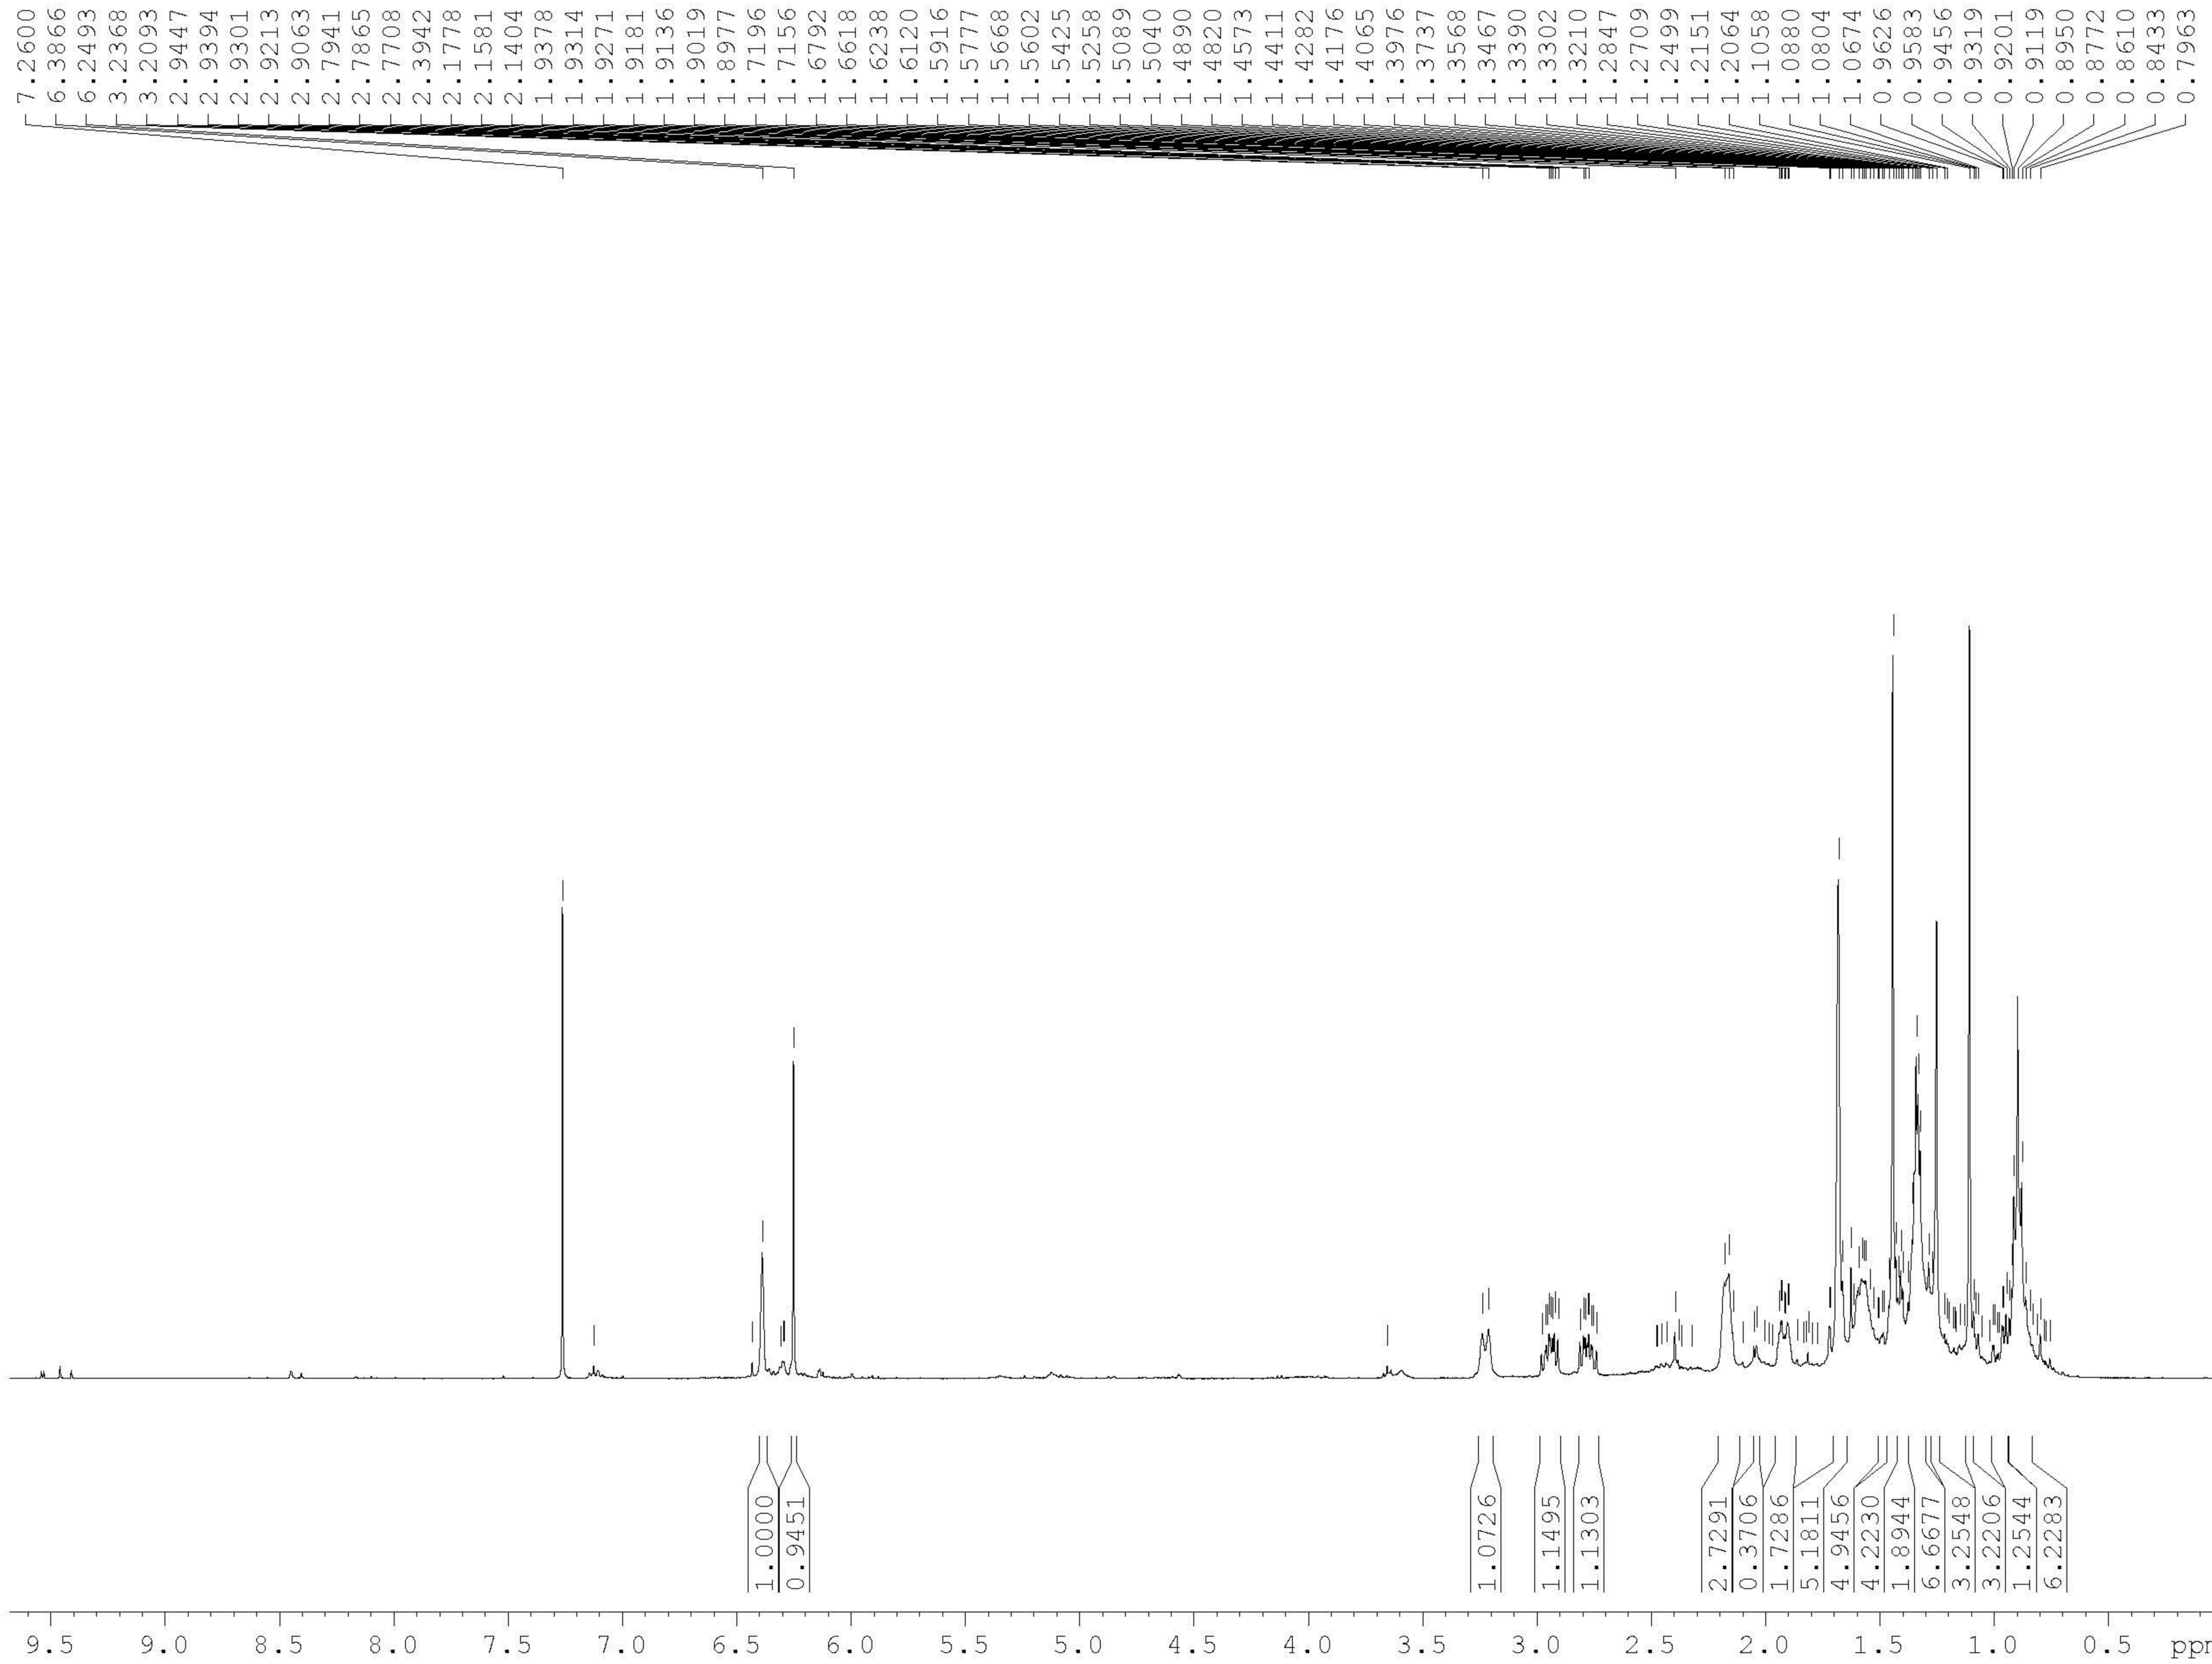

Current Data Parameters  
NAME Mauricio Cuellar  
EXPNO 510  
PROCNO 1

F2 - Acquisition Parameters  
Date\_ 20221107  
Time 14.44 h  
INSTRUM Avance  
PROBHD Z8202\_0253 (BB  
PULPROG zg30  
TD 32768  
SOLVENT CDC13  
NS 8  
DS 2  
SWH 4854.369 Hz  
FIDRES 0.296287 Hz  
AQ 3.3751040 sec  
RG 101  
DW 103.000 usec  
DE 11.68 usec  
TE 0 K  
D1 1.00000000 sec  
TDO 1  
SFO1 400.1442408 MHz  
NUC1 1H  
P0 2.33 usec  
P1 7.00 usec  
PLW1 15.52000046 W

F2 - Processing parameters  
SI 65536  
SF 400.1420097 MHz  
WDW EM  
SSB 0  
LB 0.30 Hz  
GB 0  
PC 1.00

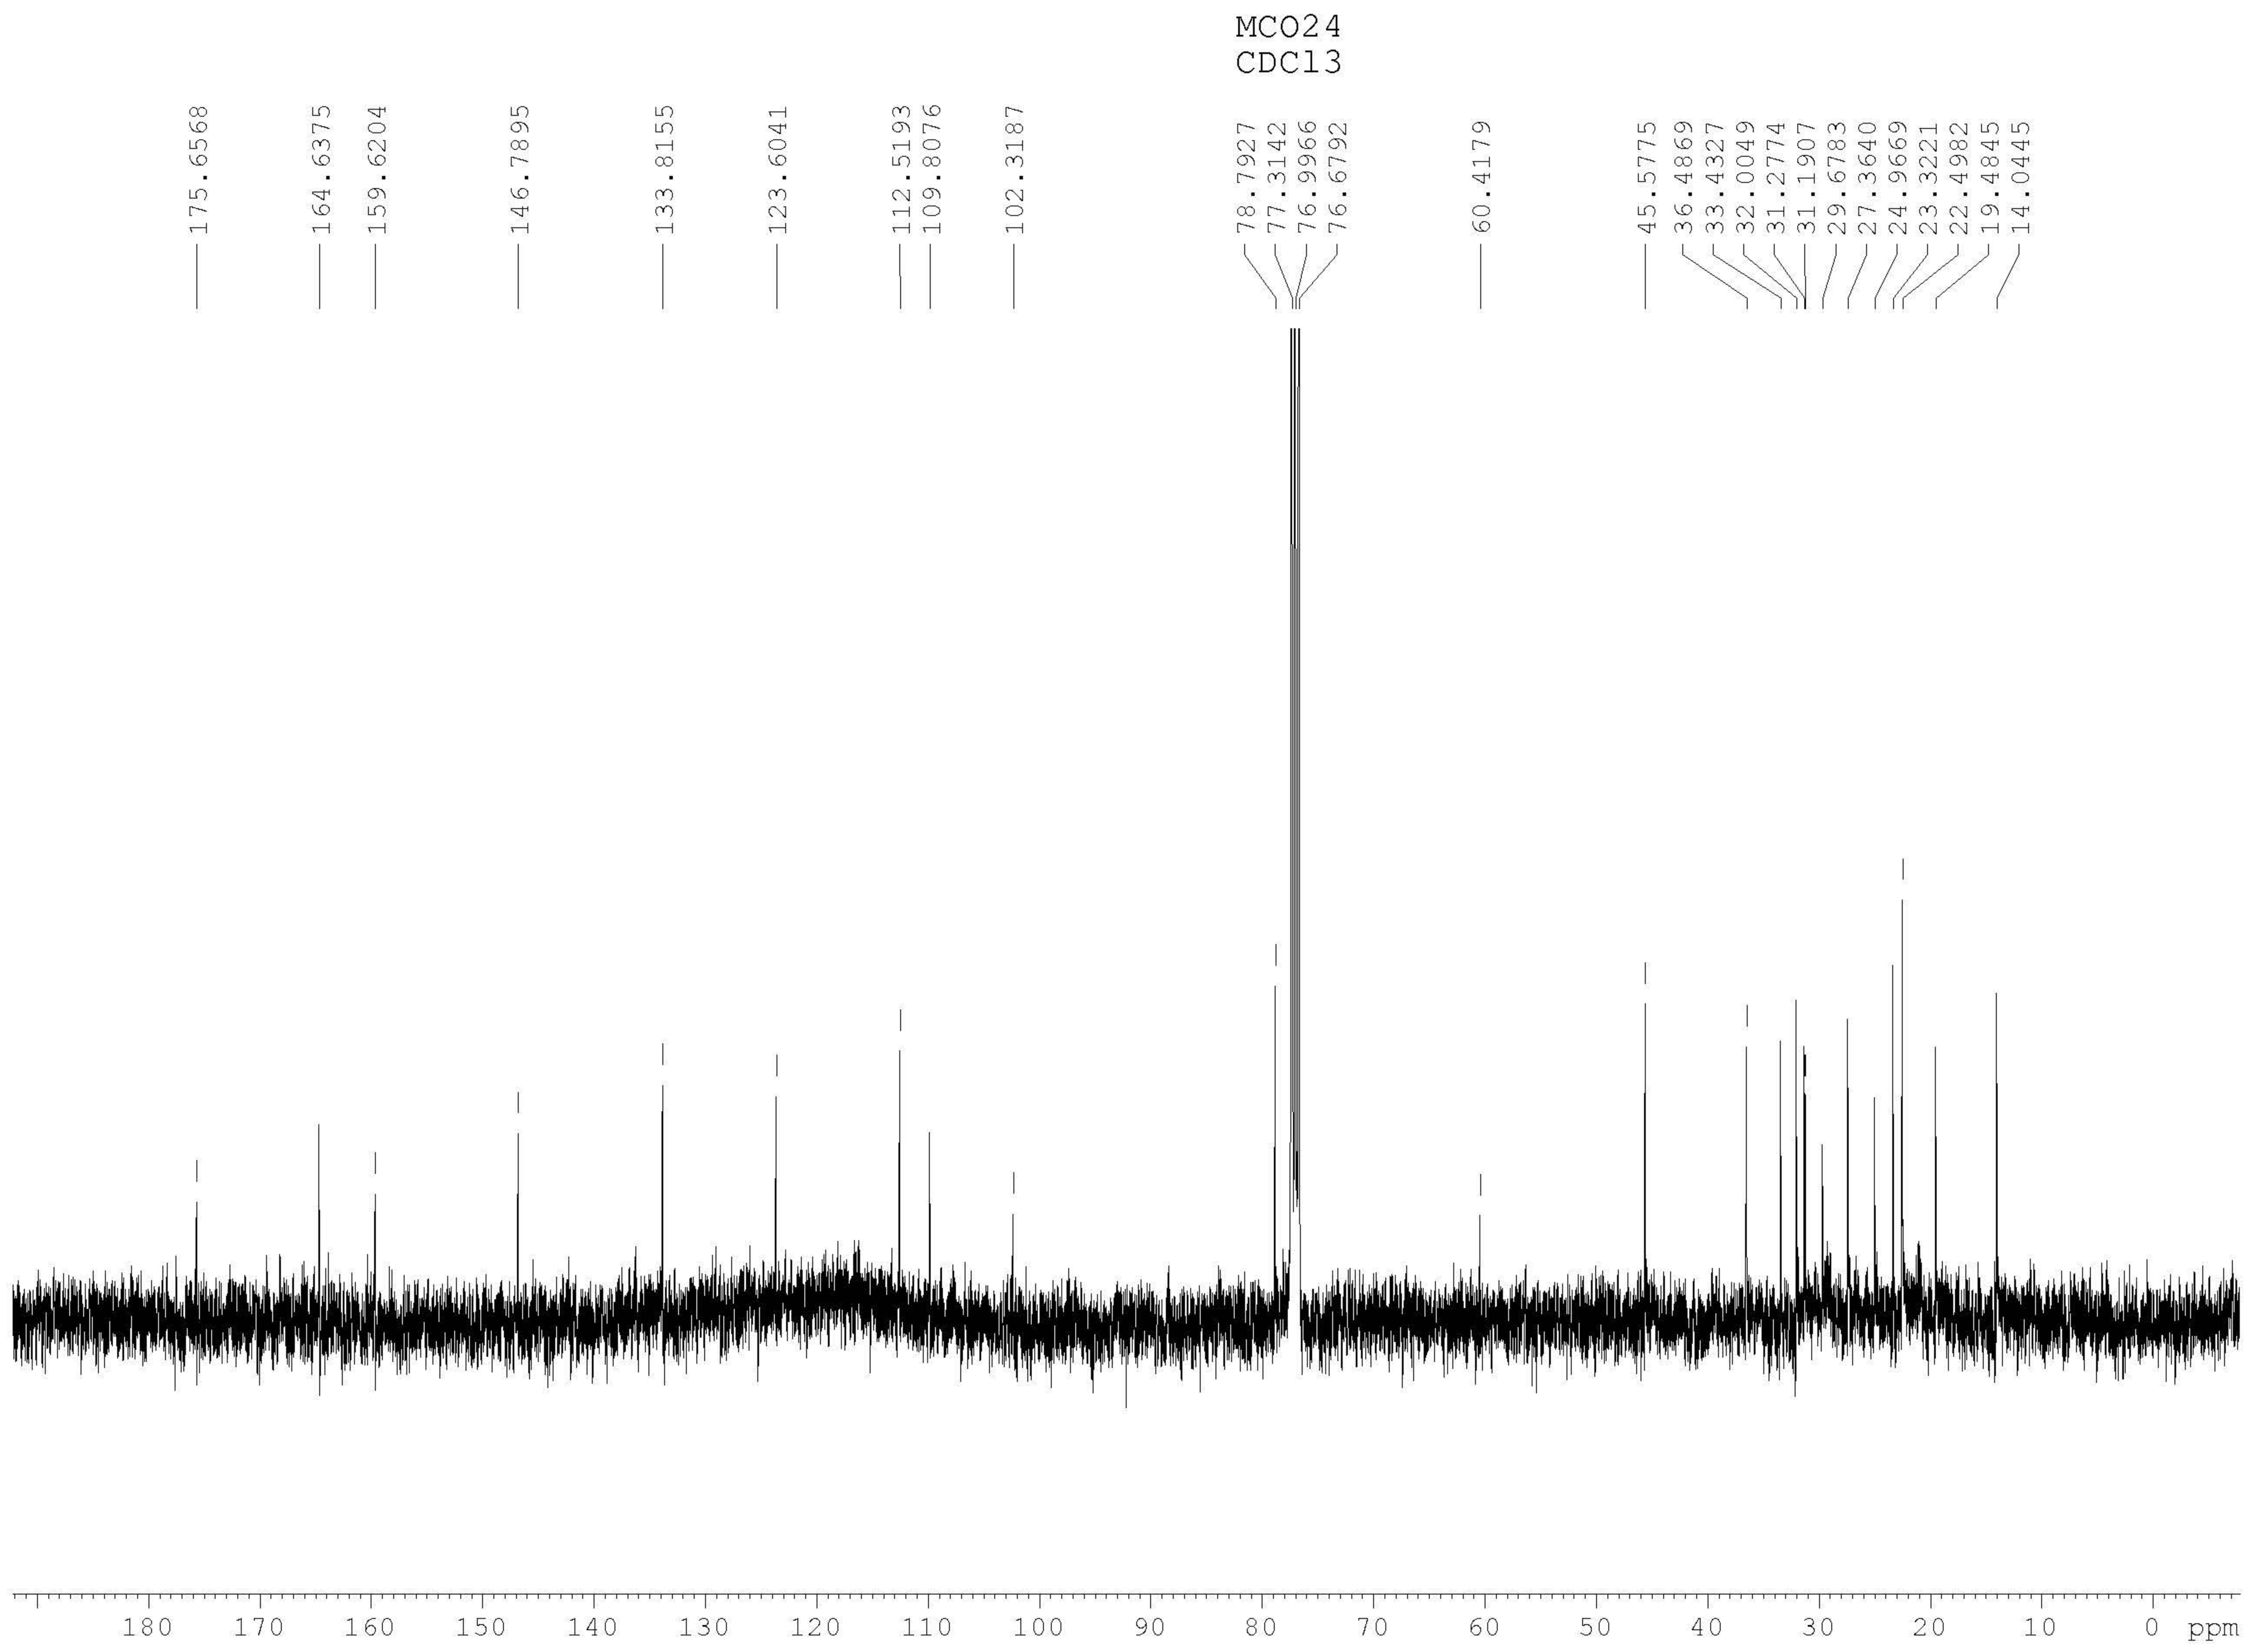

Current Data Parameters  
 NAME Mauricio Cuellar  
 EXPNO 78  
 PROCNO 1

F2 - Acquisition Parameters  
 Date\_ 20211006  
 Time 23.46 h  
 INSTRUM Avance  
 PROBHD Z8202\_0253 (BB)  
 PULPROG zgpg30  
 TD 65536  
 SOLVENT CDC13  
 NS 8000  
 DS 4  
 SWH 23809.523 Hz  
 FIDRES 0.726609 Hz  
 AQ 1.3762560 sec  
 RG 3.25  
 DW 21.000 usec  
 DE 6.50 usec  
 TE 0 K  
 D1 1.00000000 sec  
 D11 0.03000000 sec  
 TD0 1  
 SFO1 100.6258475 MHz  
 NUC1 13C  
 P0 5.00 usec  
 P1 15.00 usec  
 PLW1 100.09999847 W  
 SFO2 400.1436006 MHz  
 NUC2 1H  
 CPDPRG[2] waltz65  
 PCPD2 90.00 usec  
 PLW2 15.52000046 W  
 PLW12 0.09388900 W  
 PLW13 0.04722500 W

F2 - Processing parameters  
 SI 32768  
 SF 100.6157890 MHz  
 WDW EM  
 SSB 0  
 LB 1.00 Hz  
 GB 0  
 PC 1.40

C-1  
CDC13

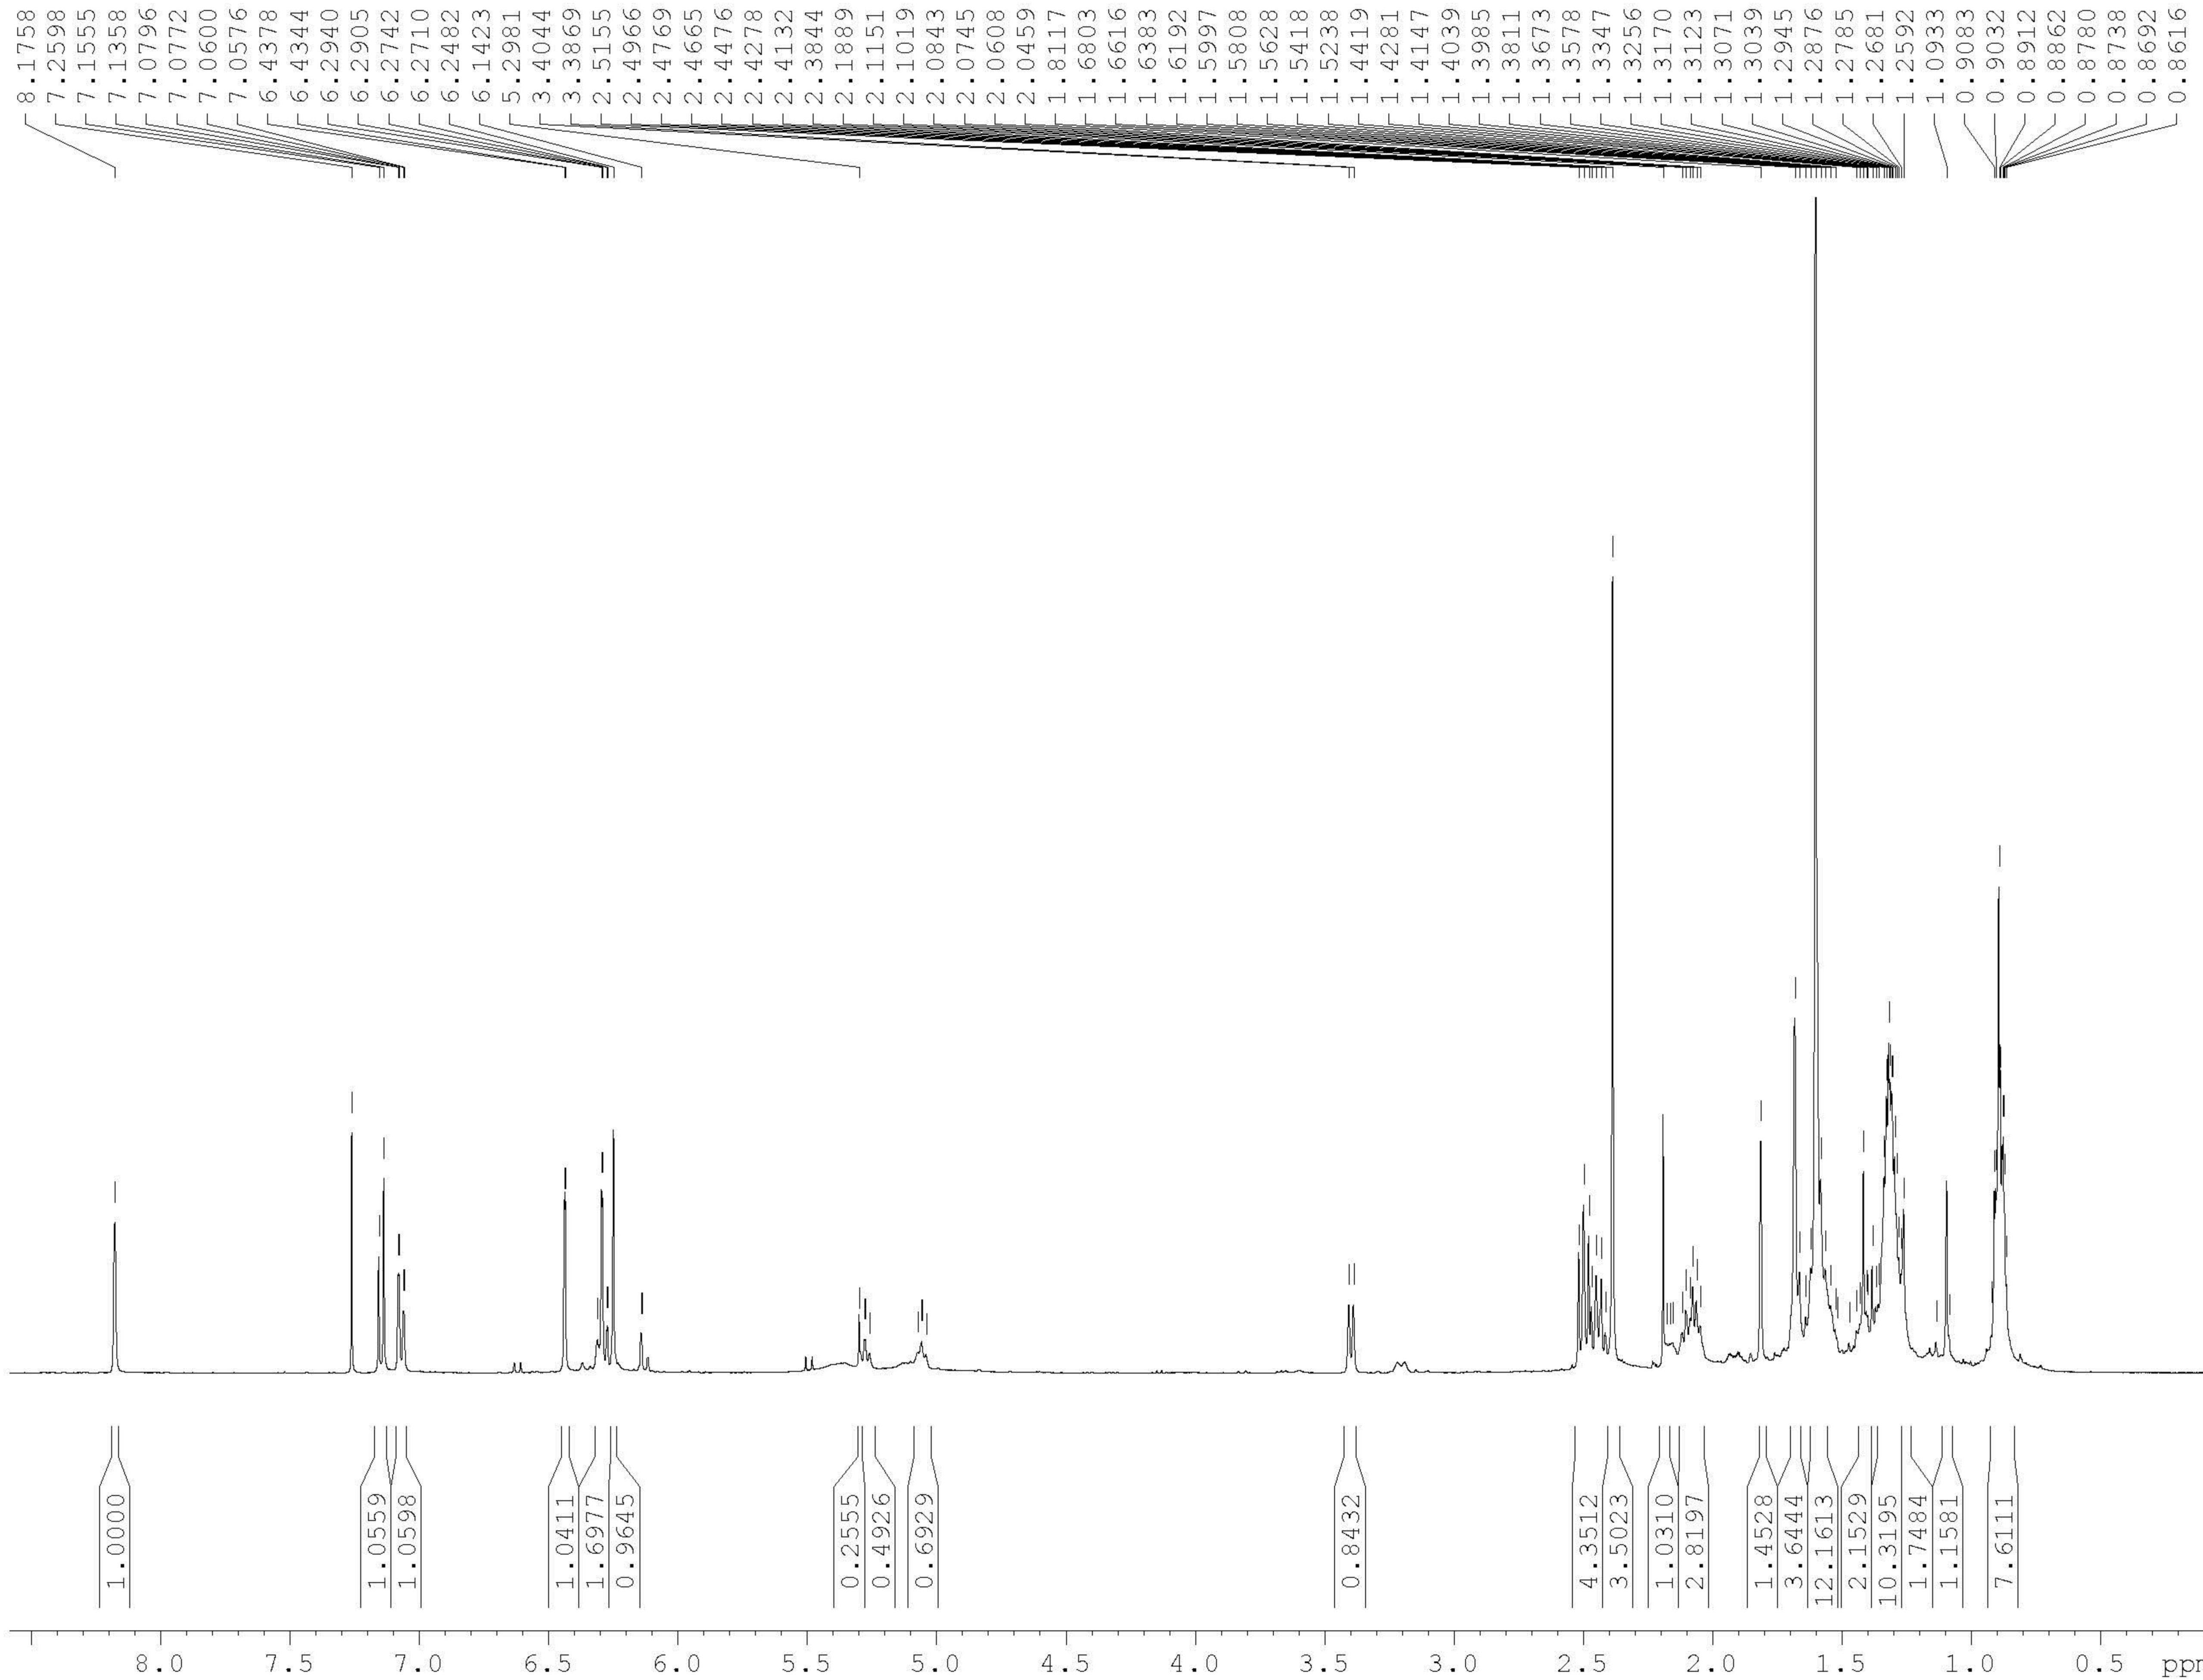

Current Data Parameters  
NAME Mauricio Cuellar  
EXPNO 443  
PROCNO 1

F2 - Acquisition Parameters  
Date\_ 20220818  
Time 11.52 h  
INSTRUM Avance  
PROBHD Z8202\_0253 (BB  
PULPROG zg30  
TD 32768  
SOLVENT CDC13  
NS 8  
DS 2  
SWH 4854.369 Hz  
FIDRES 0.296287 Hz  
AQ 3.3751040 sec  
RG 90.5  
DW 103.000 usec  
DE 11.68 usec  
TE 0 K  
D1 1.00000000 sec  
TDO 1  
SFO1 400.1442408 MHz  
NUC1 1H  
P0 2.33 usec  
P1 7.00 usec  
PLW1 15.52000046 W

F2 - Processing parameters  
SI 65536  
SF 400.1420099 MHz  
WDW EM  
SSB 0  
LB 0.30 Hz  
GB 0  
PC 1.00

C-1  
CDC13

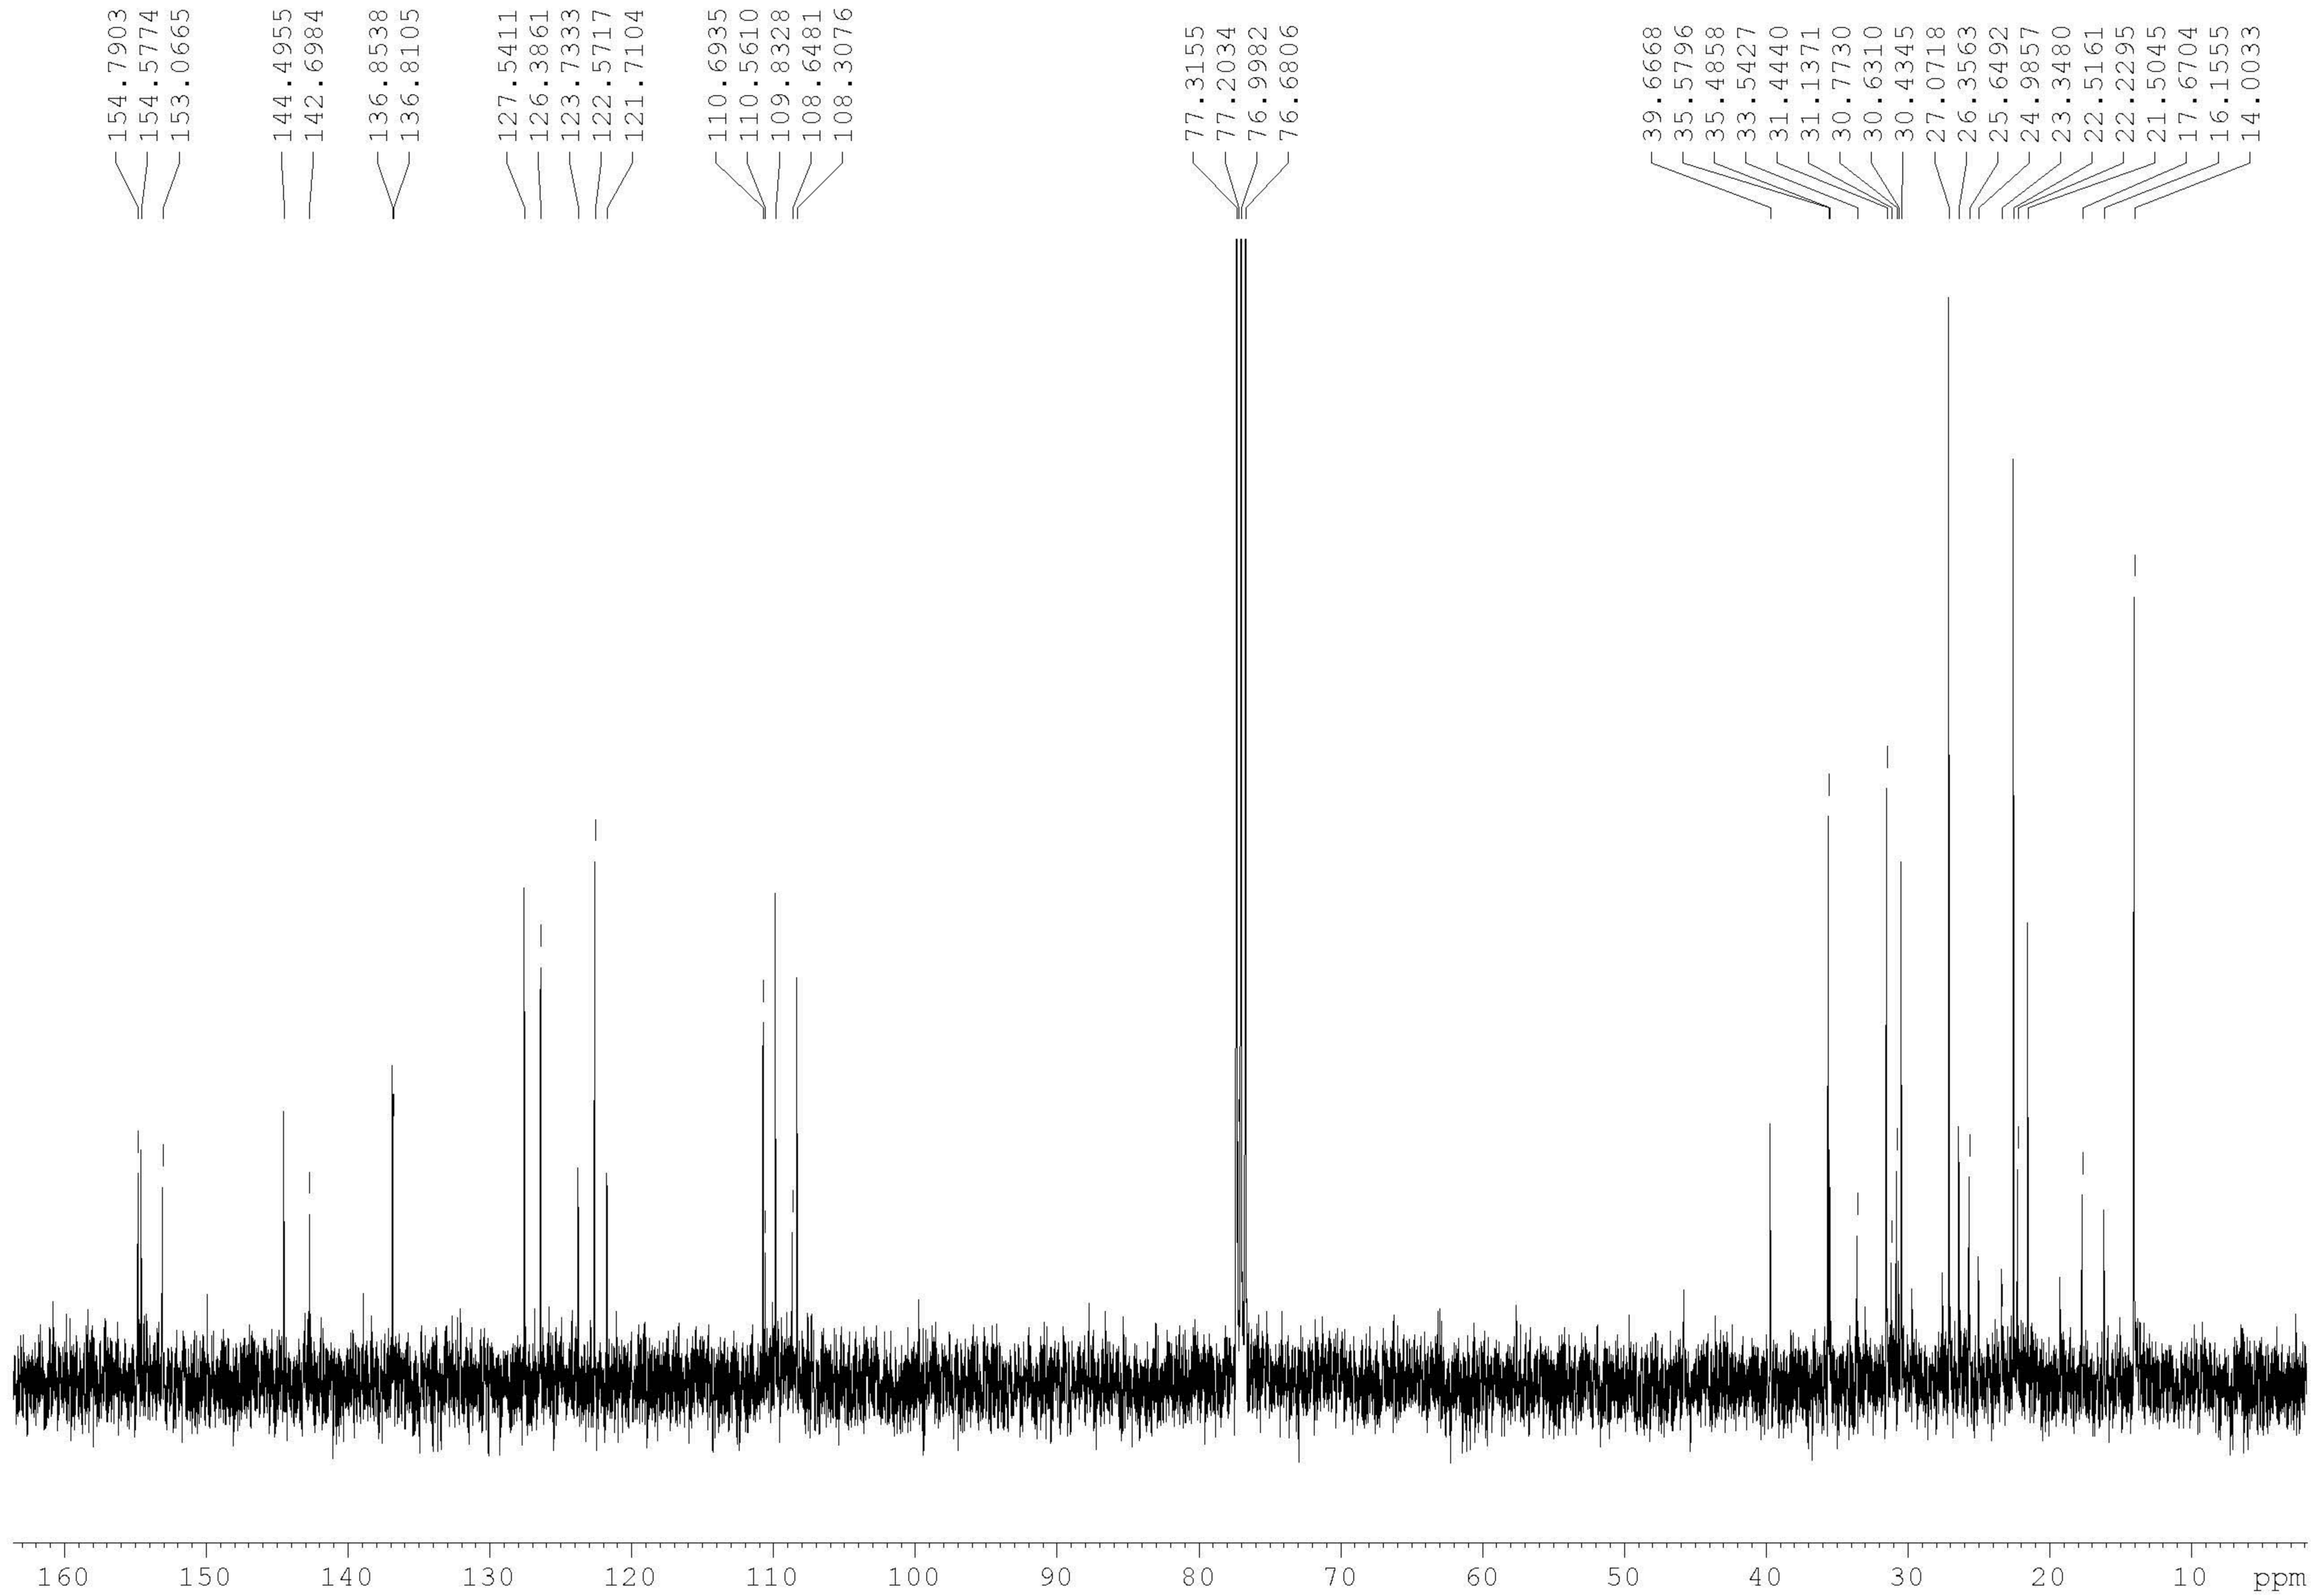

Current Data Parameters  
NAME Mauricio Cuellar  
EXPNO 449  
PROCNO 1

F2 - Acquisition Parameters  
Date\_ 20220819  
Time 10.53 h  
INSTRUM Avance  
PROBHD Z8202\_0253 (BB)  
PULPROG zgpg30  
TD 65536  
SOLVENT CDC13  
NS 512  
DS 4  
SWH 23809.523 Hz  
FIDRES 0.726609 Hz  
AQ 1.3762560 sec  
RG 3.2  
DW 21.000 usec  
DE 6.50 usec  
TE 0 K  
D1 1.00000000 sec  
D11 0.03000000 sec  
TD0 1  
SFO1 100.6258475 MHz  
NUC1 13C  
P0 5.00 usec  
P1 15.00 usec  
PLW1 100.09999847 W  
SFO2 400.1436006 MHz  
NUC2 1H  
CPDPRG[2] waltz65  
PCPD2 90.00 usec  
PLW2 15.52000046 W  
PLW12 0.09388600 W  
PLW13 0.04722400 W

F2 - Processing parameters  
SI 32768  
SF 100.6157903 MHz  
WDW EM  
SSB 0  
LB 1.00 Hz  
GB 0  
PC 1.40

C-A  
CDC13

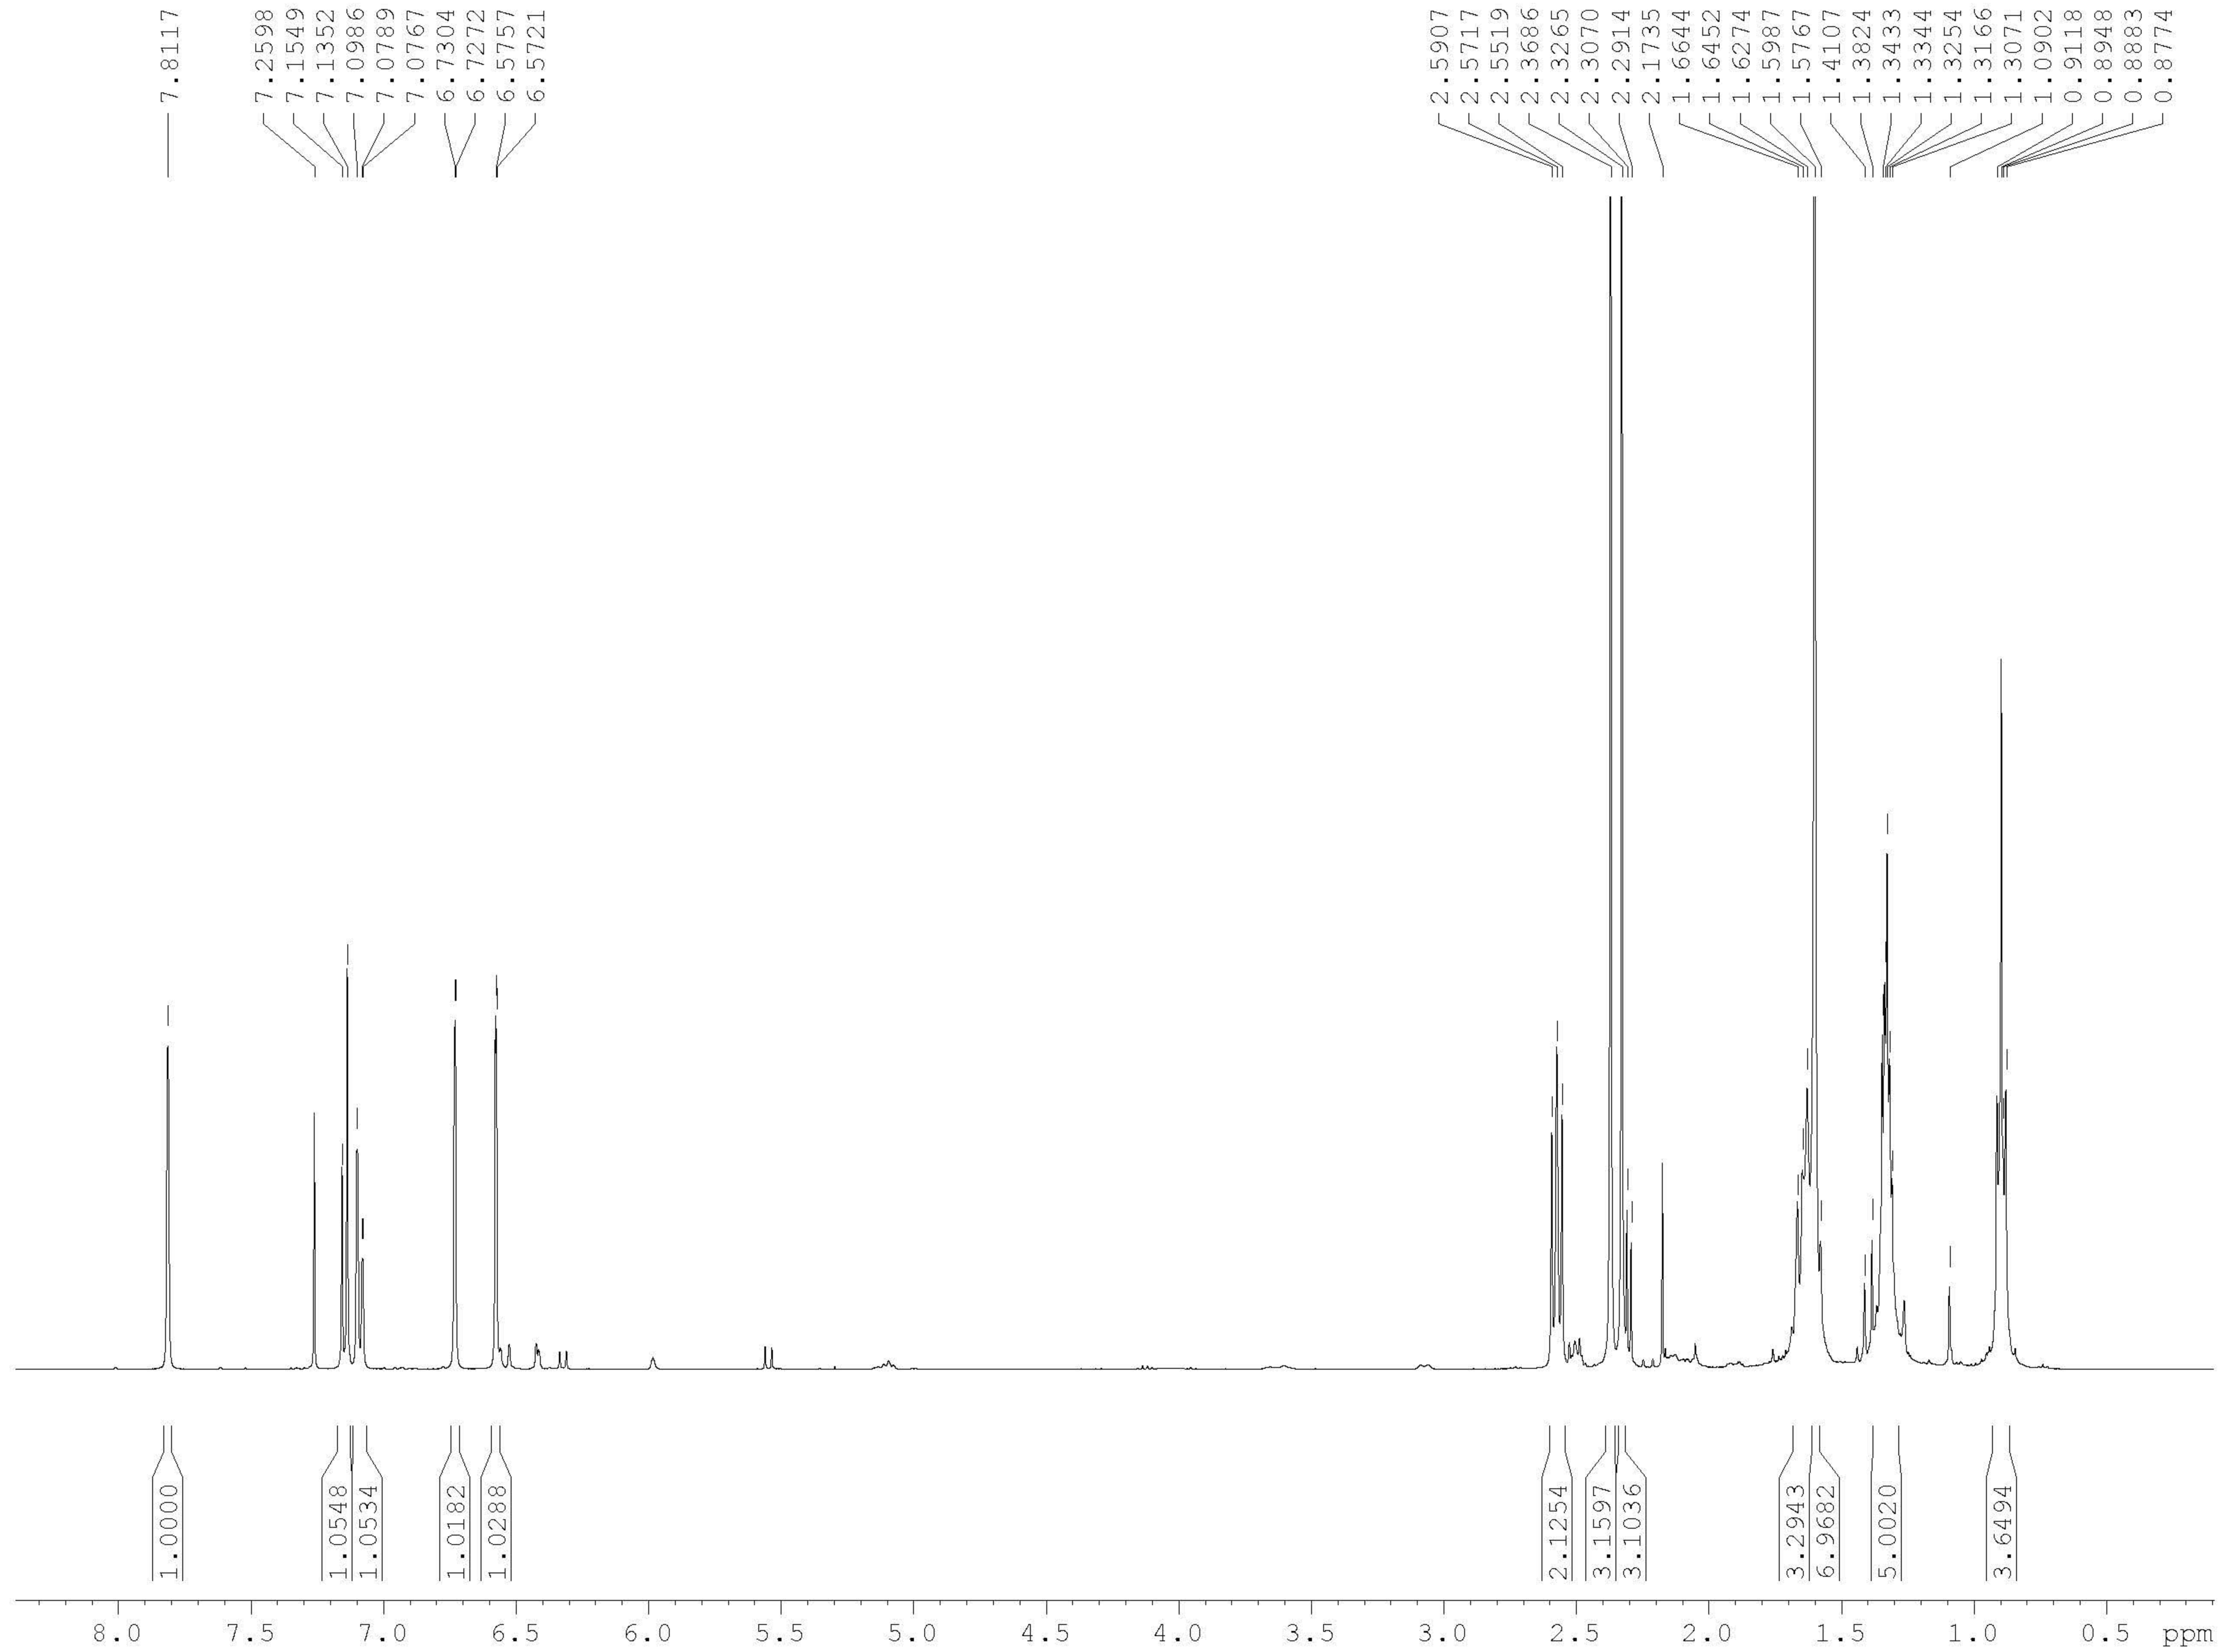

Current Data Parameters  
NAME Mauricio Cuellar  
EXPNO 457  
PROCNO 1

F2 - Acquisition Parameters  
Date\_ 20220824  
Time 15.42 h  
INSTRUM Avance  
PROBHD Z8202\_0253 (BB)  
PULPROG zg30  
TD 32768  
SOLVENT CDC13  
NS 8  
DS 2  
SWH 4854.369 Hz  
FIDRES 0.296287 Hz  
AQ 3.3751040 sec  
RG 71.8  
DW 103.000 usec  
DE 11.68 usec  
TE 0 K  
D1 1.00000000 sec  
TD0 1  
SFO1 400.1442408 MHz  
NUC1 1H  
P0 2.33 usec  
P1 7.00 usec  
PLW1 15.52000046 W

F2 - Processing parameters  
SI 65536  
SF 400.1420100 MHz  
WDW EM  
SSB 0  
LB 0.30 Hz  
GB 0  
PC 1.00

TA-B  
CDC13

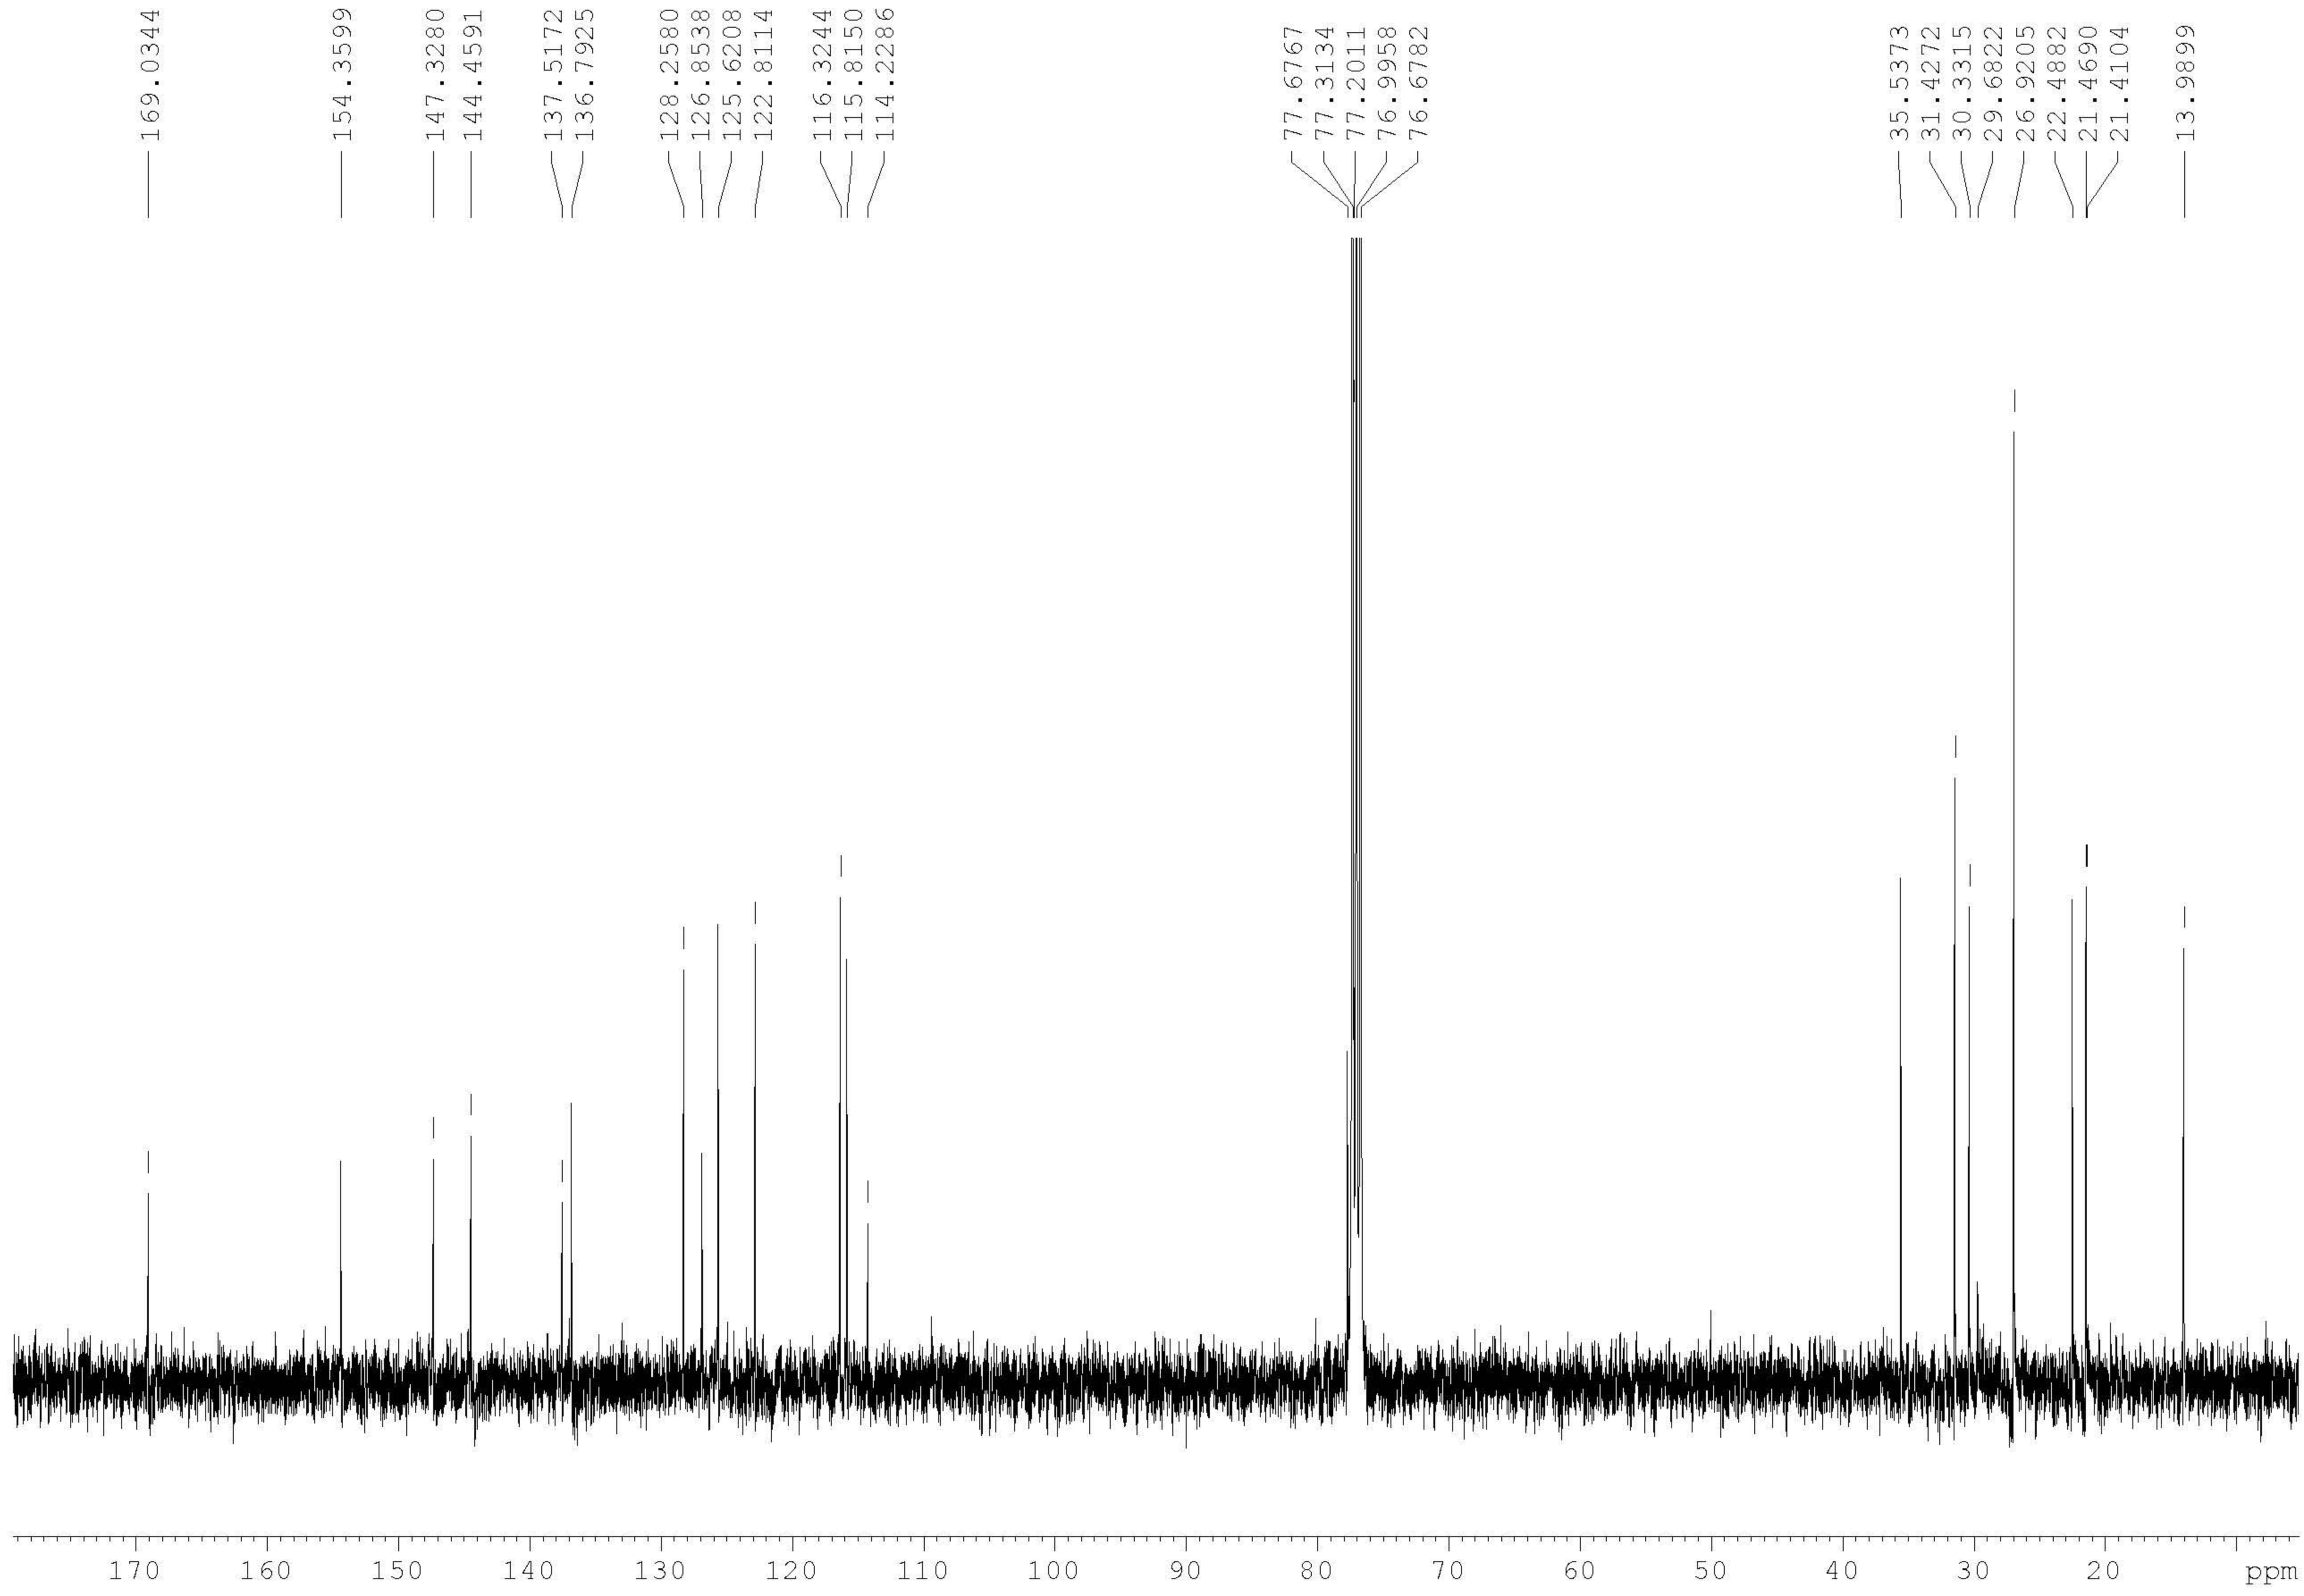

Current Data Parameters  
NAME Mauricio Cuellar  
EXPNO 508  
PROCNO 1

F2 - Acquisition Parameters  
Date\_ 20221103  
Time 21.32 h  
INSTRUM Avance  
PROBHD Z8202\_0253 (BB)  
PULPROG zgpg30  
TD 65536  
SOLVENT CDC13  
NS 9024  
DS 4  
SWH 23809.523 Hz  
FIDRES 0.726609 Hz  
AQ 1.3762560 sec  
RG 3.2  
DW 21.000 usec  
DE 6.50 usec  
TE 0 K  
D1 1.00000000 sec  
D11 0.03000000 sec  
TD0 1  
SFO1 100.6258475 MHz  
NUC1 13C  
P0 5.00 usec  
P1 15.00 usec  
PLW1 100.09999847 W  
SFO2 400.1436006 MHz  
NUC2 1H  
CPDPRG[2] waltz65  
PCPD2 90.00 usec  
PLW2 15.52000046 W  
PLW12 0.09388600 W  
PLW13 0.04722400 W

F2 - Processing parameters  
SI 32768  
SF 100.6157885 MHz  
WDW EM  
SSB 0  
LB 1.00 Hz  
GB 0  
PC 1.40

Ref.: 12529/18  
VBE/apa

5514 08.10.2018

SANTIAGO,

**VISTO ESTOS ANTECEDENTES:** la solicitud del Q. F. Héctor Rojas Campusano, Director Técnico de Knop Laboratorios S.A., por la que solicita autorización para trasladar desde Knop Laboratorios S.A., ubicado en Av. Industrial N° 1198, Quilpué, Región de Valparaíso, hasta la Universidad de Valparaíso (QUIFAC), ubicada en Av. Gran Bretaña N° 1093, Playa Ancha, Valparaíso, la muestra de **Hierba Cannabis Sativa** indicada en la parte resolutive; y

**CONSIDERANDO:** que la muestra será trasladada a la Universidad de Valparaíso (QUIFAC), para proyecto de investigación; y

**TENIENDO PRESENTE:** lo dispuesto en el Código Sanitario, Decreto con Fuerza de Ley N° 725 de 1968; los Reglamentos de Estupefacientes y de Productos Psicotrópicos, aprobados por los Decretos Supremos N° 404/83 y N° 405/83, del Ministerio de Salud; los artículos 59° letra b) y 61° letra b) del DFL N° 1 de 2005 y las facultades delegadas por la Resolución N° 977 de 19/03/2015 de la Dirección del Instituto de Salud Pública de Chile, dicto lo siguiente:

## RESOLUCIÓN

1.-**AUTORÍZASE** a Knop Laboratorios S.A., para trasladar a la Universidad de Valparaíso (QUIFAC) la muestra de droga estupefaciente que a continuación se señala:

| Droga a trasladar      | Cantidad       | Desde                                                                              | Hasta                                                                                      |
|------------------------|----------------|------------------------------------------------------------------------------------|--------------------------------------------------------------------------------------------|
| Hierba Cannabis Sativa | 5230<br>gramos | Knop Laboratorios S.A.<br>Av. Industrial N° 1198, Quilpué,<br>Región de Valparaíso | Universidad de Valparaíso (QUIFAC)<br>Av. Gran Bretaña N° 1093, Playa<br>Ancha, Valparaíso |

2.- **DÉJESE ESTABLECIDO** que el Q.F. Rodrigo Díaz V., Director Técnico de la Universidad de Valparaíso (QUIFAC), será responsable de la tenencia y almacenamiento del producto en las nuevas dependencias.

ANÓTESE Y COMUNÍQUESE

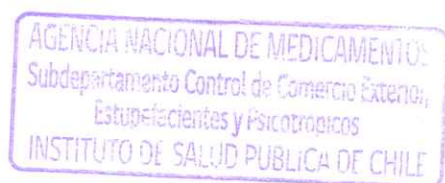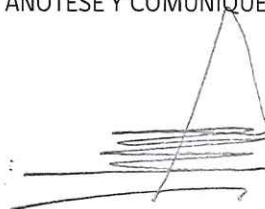

**Q.F. CARLOS BRAVO GOLDSMITH**  
JEFE SUBDEPARTAMENTO CONTROL COMERCIO EXTERIOR,  
ESTUPEFACIENTES Y PSICOTRÓPICOS  
DEPARTAMENTO AGENCIA NACIONAL DE MEDICAMENTOS  
INSTITUTO DE SALUD PÚBLICA DE CHILE

**DISTRIBUCIÓN:**

- Knop Laboratorios S.A.
- Universidad de Valparaíso (QUIFAC)
- Gestión de Trámites

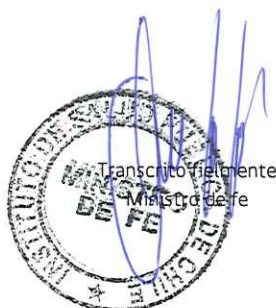

Supplement: MOESM1 [file 40659_2024_506_MOESM1_ESM.pdf]
